# Supplementary material
Source: publisher site journal article supplement (https://www.spandidos-publications.com/3383/downloadSupplementary)
Supplement: Supplementary file 1 [file downloadSupplementary]

## Sheet: 工作表1
Table SVIII. DMRs in non-isolated cardiac defects
ID	logFC	P.Value	Annotation	region	gene	promoter_gene
chr8:145982919-145985969	-2.91542	5.07868e-06	promoter region:ZNF34|NM_030580(-)	promoter region	ZNF34	ZNF34
chr6:166952096-166952796	-2.85065	7.69291e-06	within:RPS6KA2|NM_001006932(-)//RPS6KA2|NM_021135(-)	within	RPS6KA2
chr7:76093946-76096996	-2.92604	8.97732e-06	promoter region:POMZP3|NM_152992(-)//POMZP3|NM_012230(-)	promoter region	POMZP3	POMZP3
chr17:8006408-8009458	-2.98862	1.01887e-05	promoter region:VAMP2|NM_014232(-)	promoter region	VAMP2	VAMP2
chr3:49144993-49148043	-2.84286	1.12058e-05	promoter region:LAMB2|NM_002292(-)	promoter region	LAMB2	LAMB2
chr5:17544315-17545015	-2.80571	1.18161e-05	left:BASP1|NM_006317(273566+)	left	BASP1
chr6:167805598-167806299	-2.80893	1.28808e-05	left:TCP10|NM_004610(87610-)	left	TCP10
chr1_random:343226-343926	-2.79079	1.37896e-05	left:TAS1R3|NM_152228(76273+)	left	TAS1R3
chr14:23781110-23784160	-2.802	1.41226e-05	promoter region:TINF2|NM_012461(-)//TINF2|NM_001099274(-)	promoter region	TINF2	TINF2
chr18:74653532-74654233	-2.86792	1.47843e-05	left:GALR1|NM_001480(1562537+)	left	GALR1
chr7:62792003-62792703	-2.80192	1.53083e-05	left:LOC643955|NR_003952(390134-)	left	LOC643955
chr19:12614060-12614760	-2.8325	1.60682e-05	left:ZNF791|NM_153358(31329+)	left	ZNF791
chr3:49178179-49181229	-2.79883	1.62501e-05	promoter region:CCDC71|NM_022903(-)	promoter region	CCDC71	CCDC71
chr1:219123883-219124583	-2.7785	1.66521e-05	within:HLX|NM_021958(+)	within	HLX
chr22:45475708-45476409	-2.78213	1.74673e-05	within:CERK|NM_022766(-)	within	CERK
chr11:129583280-129583980	-2.76607	1.80016e-05	within:ST14|NM_021978(+)	within	ST14
chr19:54617272-54620950	-2.83083	1.83059e-05	promoter region:PTH2|NM_178449(-)	promoter region	PTH2	PTH2
chr17:15628448-15631498	-2.78267	2.079e-05	promoter region:MEIS3P1|NR_002211(+)	promoter region	MEIS3P1	MEIS3P1
chr6:149908254-149911304	-2.78143	2.08523e-05	promoter region:PPIL4|NM_139126(-)	promoter region	PPIL4	PPIL4
chr22:40269800-40272865	-2.75113	2.1001e-05	promoter region:POLR3H|NM_001018052(-)//POLR3H|NM_001018050(-)//POLR3H|NM_138338(-)	promoter region	POLR3H	POLR3H
chr5:1106325-1107026	-2.72924	2.26776e-05	within:SLC12A7|NM_006598(-)	within	SLC12A7
chr19:4588089-4591139	-2.74667	2.30108e-05	promoter region:TNFAIP8L1|NM_152362(+)	promoter region	TNFAIP8L1	TNFAIP8L1
chr2:242414637-242415337	-2.72827	2.32003e-05	left:NEU4|NM_080741(13892+)	left	NEU4
chr5:17687886-17688587	-2.72562	2.38898e-05	left:BASP1|NM_006317(417137+)	left	BASP1
chr13:112540312-112541012	-2.73679	2.44589e-05	within:ATP11A|NM_032189(+)//ATP11A|NM_015205(+)	within	ATP11A
chr6:37427285-37430620	-2.795	2.53831e-05	promoter region:RNF8|NM_003958(+)//RNF8|NM_183078(+)	promoter region	RNF8	RNF8
chr19:56226808-56227509	-2.72458	2.59096e-05	within:KLK12|NM_145894(-)//KLK12|NM_145895(-)//KLK12|NM_019598(-)	within	KLK12
chr6:41619701-41624167	-2.70917	2.61187e-05	promoter region:FOXP4|NM_138457(+)//FOXP4|NM_001012427(+)//FOXP4|NM_001012426(+)	promoter region	FOXP4	FOXP4
chr19:39680339-39681040	-2.78256	2.61397e-05	within:WTIP|NM_001080436(+)	within	WTIP
chr20:31695597-31696298	-2.72094	2.63671e-05	within:CBFA2T2|NM_001039709(+)//CBFA2T2|NM_005093(+)//CBFA2T2|NM_001032999(+)	within	CBFA2T2
chr21:42094377-42095077	-2.74071	2.64448e-05	within:PRDM15|NM_001040424(-)	within	PRDM15
chrX:70901499-70902199	-2.72345	2.7014e-05	within:CXorf49|NM_001145140(+)//CXorf49B|NM_001145139(+)	within	CXorf49
chr20:55118611-55119311	-2.70515	2.71736e-05	left:TFAP2C|NM_003222(480847+)	left	TFAP2C
chr8:725686-726387	-2.70036	2.96823e-05	left:ERICH1|NM_207332(54460-)	left	ERICH1
chr17:1029126-1032321	-2.72384	3.06316e-05	promoter region:ABR|NM_021962(-)	promoter region	ABR	ABR
chrX:153534425-153537476	-2.70126	3.07868e-05	promoter region:CTAG2|NM_172377(-)//CTAG2|NM_020994(-)	promoter region	CTAG2	CTAG2
chr7:559015-559715	-2.71952	3.09326e-05	within:PRKAR1B|NM_002735(-)	within	PRKAR1B
chr14:99841573-99845053	-2.73708	3.10136e-05	promoter region:SLC25A29|NM_001039355(-)	promoter region	SLC25A29	SLC25A29
chr7:98759005-98762055	-2.75167	3.14529e-05	promoter region:ARPC1A|NM_006409(+)	promoter region	ARPC1A	ARPC1A
chr21:44375481-44378531	-2.69368	3.16424e-05	promoter region:C21orf33|NM_198155(+)//C21orf33|NM_004649(+)	promoter region	C21orf33	C21orf33
chr11:624864-630628	-2.71286	3.22792e-05	promoter region:DRD4|NM_000797(+)	promoter region	DRD4	DRD4
chr12:100979419-100982469	-2.80357	3.23556e-05	promoter region:CCDC53|NM_016053(-)	promoter region	CCDC53	CCDC53
chr13:28975017-28975718	-2.7125	3.24188e-05	within:MTUS2|NM_001033602(+)//MTUS2|NM_015233(+)	within	MTUS2
chr20:50134555-50135256	-2.68794	3.33216e-05	within:ZFP64|NM_199427(-)	within	ZFP64
chr2:172484763-172487813	-2.67988	3.33832e-05	promoter region:HAT1|NM_001033085(+)//HAT1|NM_003642(+)	promoter region	HAT1	HAT1
chr2:231822523-231823223	-2.69036	3.34351e-05	within:ARMC9|NM_025139(+)	within	ARMC9
chr4:2247154-2247854	-2.68614	3.36125e-05	within:ZFYVE28|NM_020972(-)	within	ZFYVE28
chr12:122432216-122435334	-2.69786	3.36322e-05	promoter region:SETD8|NM_020382(+)	promoter region	SETD8	SETD8
chr8:144487815-144490865	-2.71528	3.38533e-05	promoter region:TOP1MT|NM_052963(-)	promoter region	TOP1MT	TOP1MT
chr10:133803702-133804402	-2.69082	3.39178e-05	within:JAKMIP3|NM_001105521(+)	within	JAKMIP3
chr4:3711673-3712373	-2.7275	3.42812e-05	left:LRPAP1|NM_002337(207651-)	left	LRPAP1
chr3:47862641-47863342	-2.6871	3.48756e-05	within:DHX30|NM_138615(+)//DHX30|NM_014966(+)	within	DHX30
chr20:39679759-39682987	-2.71833	3.53177e-05	promoter region:CHD6|NM_032221(-)	promoter region	CHD6	CHD6
chr1:1409968-1410668	-2.68429	3.53289e-05	within:ATAD3B|NM_031921(+)	within	ATAD3B
chr17:17653636-17655181	-2.70175	3.57644e-05	within:RAI1|NM_030665(+)	within	RAI1
chr3:116822400-116825450	-2.7045	3.60965e-05	promoter region:GAP43|NM_002045(+)//GAP43|NM_001130064(+)	promoter region	GAP43	GAP43
chrX:153135956-153139006	-2.72225	3.62172e-05	promoter region:OPN1MW|NM_000513(+)//OPN1MW2|NM_001048181(+)	promoter region	OPN1MW	OPN1MW
chr17:38409854-38412904	-2.69675	3.62195e-05	promoter region:IFI35|NM_005533(+)	promoter region	IFI35	IFI35
chr8:9946799-9950043	-2.75	3.72666e-05	promoter region:MSRA|NM_012331(+)//MSRA|NM_001135670(+)	promoter region	MSRA	MSRA
chr14:95184827-95187877	-2.72901	3.75642e-05	promoter region:TCL6|NM_020554(+)//TCL6|NM_020553(+)	promoter region	TCL6	TCL6
chr12:4886893-4891432	-2.67753	3.75844e-05	promoter region:KCNA1|NM_000217(+)	promoter region	KCNA1	KCNA1
chr2:235522926-235526455	-2.6675	3.78533e-05	promoter region:SH3BP4|NM_014521(+)	promoter region	SH3BP4	SH3BP4
chr4:1615572-1616272	-2.71708	3.81021e-05	within:FAM53A|NM_001013622(-)	within	FAM53A
chrX:52752364-52755414	-2.69363	3.85335e-05	promoter region:SSX2|NM_003147(-)//SSX2|NM_175698(-)	promoter region	SSX2	SSX2
chrY:786383-787083	-2.69563	3.88993e-05	left:SHOX|NM_006883//SHOX|NM_000451(281305+)	left	SHOX
chr19:338807-339507	-2.6656	3.89122e-05	left:THEG|NM_016585//THEG|NM_199202(11798-)	left	THEG
chrY:1476983-1480033	-2.66438	3.96306e-05	promoter region:ASMTLAS|NR_026711(+)//ASMTLAS|NR_026710(+)	promoter region	ASMTLAS	ASMTLAS
chr9:137810193-137810894	-2.64568	4.08213e-05	within:KCNT1|NM_020822(+)	within	KCNT1
chr10:115426484-115430186	-2.76167	4.11046e-05	promoter region:CASP7|NM_001227(+)//CASP7|NM_033338(+)//CASP7|NM_033340(+)//CASP7|NM_033339(+)	promoter region	CASP7	CASP7
chr19:63776013-63779194	-2.7165	4.14797e-05	promoter region:MGC2752|NR_026052(+)//MZF1|NM_003422(-)//MZF1|NM_198055(-)	promoter region	MGC2752	MGC2752
chr9:70871582-70872282	-2.65696	4.15308e-05	within:FXN|NM_181425(+)//FXN|NM_000144(+)	within	FXN
chr17:73736545-73740190	-2.65257	4.24201e-05	promoter region:LOC283999|NM_001145529(+)	promoter region	LOC283999	LOC283999
chr10:6302415-6303115	-2.66625	4.24687e-05	within:PFKFB3|NM_004566(+)//PFKFB3|NM_001145443(+)	within	PFKFB3
chr11:67644553-67647874	-2.66469	4.27202e-05	promoter region:CHKA|NM_001277(-)//CHKA|NM_212469(-)	promoter region	CHKA	CHKA
chr1:22221853-22225238	-2.66425	4.28762e-05	promoter region:HSPC157|NR_023918(+)//HSPC157|NR_023919(+)	promoter region	HSPC157	HSPC157
chr3:156509941-156510642	-2.7028	4.29086e-05	left:MME|NM_007289(229169+)	left	MME
chr7:56917237-56917937	-2.67193	4.33488e-05	left:|NR_027050(69314-)	left
chr22:47524042-47524743	-2.64533	4.3769e-05	within:FAM19A5|NM_015381(+)//FAM19A5|NM_001082967(+)	within	FAM19A5
chr7:100076499-100079549	-2.66315	4.40241e-05	promoter region:TFR2|NM_003227(-)	promoter region	TFR2	TFR2
chrY:170277-173327	-2.64782	4.44038e-05	promoter region:GTPBP6|NM_012227(-)	promoter region	GTPBP6	GTPBP6
chr19:51899196-51899896	-2.64149	4.49373e-05	within:PRKD2|NM_016457(-)//PRKD2|NM_001079880(-)//PRKD2|NM_001079881(-)//PRKD2|NM_001079882(-)	within	PRKD2
chr2:112370221-112373389	-2.66768	4.57456e-05	promoter region:MERTK|NM_006343(+)	promoter region	MERTK	MERTK
chr22:41372329-41377789	-2.6551	4.62378e-05	promoter region:CYB5R3|NM_001129819(-)//CYB5R3|NM_007326(-)//CYB5R3|NM_000398(-)	promoter region	CYB5R3	CYB5R3
chr1:232558945-232559645	-2.6439	4.66581e-05	left:SLC35F3|NM_173508(451644+)	left	SLC35F3
chr19:5290640-5294254	-2.7145	4.70455e-05	promoter region:PTPRS|NM_130854(-)//PTPRS|NM_002850(-)//PTPRS|NM_130853(-)//PTPRS|NM_130855(-)	promoter region	PTPRS	PTPRS
chr13:112735275-112735976	-2.65823	4.72463e-05	within:MCF2L|NM_001112732(+)//MCF2L|NM_024979(+)	within	MCF2L
chr17:77939762-77940463	-2.6653	4.72529e-05	left:UTS2R|NM_018949(14273+)	left	UTS2R
chr22:40665559-40668609	-2.67702	4.74392e-05	promoter region:CENPM|NM_001110215(-)	promoter region	CENPM	CENPM
chr16:16330794-16333844	-2.6425	4.77917e-05	promoter region:PKD1P1|NM_178541(+)	promoter region	PKD1P1	PKD1P1
chr22:40854675-40855852	-2.6431	4.77935e-05	within:CYP2D6|NM_000106(-)//CYP2D6|NM_001025161(-)	within	CYP2D6
chr19:2285283-2285983	-2.62964	4.79779e-05	within:SPPL2B|NM_152988(+)//SPPL2B|NM_001077238(+)	within	SPPL2B
chr7:55379459-55380266	-2.62237	4.84406e-05	left:EGFR|NM_201283//EGFR|NM_201282//EGFR|NM_201284//EGFR|NM_005228(325241+)	left	EGFR
chr16:29103805-29104505	-2.63889	4.90938e-05	left:RRN3P2|NR_003369(110142+)	left	RRN3P2
chr8:105547832-105550893	-2.6652	4.91892e-05	promoter region:DPYS|NM_001385(-)	promoter region	DPYS	DPYS
chr21:45647084-45650662	-2.76136	4.92127e-05	promoter region:COL18A1|NM_130445(+)	promoter region	COL18A1	COL18A1
chr22:29971907-29974957	-2.64917	4.93434e-05	promoter region:LIMK2|NM_016733(+)//LIMK2|NM_001031801(+)	promoter region	LIMK2	LIMK2
chr17:76056953-76057654	-2.6475	4.9792e-05	within:NPTX1|NM_002522(-)	within	NPTX1
chr16:30523182-30523883	-2.68006	5.01278e-05	within:ZNF689|NM_138447(-)	within	ZNF689
chr19:2258479-2261596	-2.6286	5.06022e-05	promoter region:LINGO3|NM_001101391(-)	promoter region	LINGO3	LINGO3
chr11:117359875-117362925	-2.66483	5.09824e-05	promoter region:IL10RA|NR_026691(+)//IL10RA|NM_001558(+)	promoter region	IL10RA	IL10RA
chrX:152862816-152865866	-2.62023	5.16973e-05	promoter region:RENBP|NM_002910(-)	promoter region	RENBP	RENBP
chr3:52453473-52456523	-2.64062	5.18451e-05	promoter region:SEMA3G|NM_020163(-)	promoter region	SEMA3G	SEMA3G
chr19:1429603-1432668	-2.64425	5.19149e-05	promoter region:C19orf25|NM_152482(-)	promoter region	C19orf25	C19orf25
chr10:104208719-104211769	-2.65479	5.20367e-05	promoter region:TMEM180|NM_024789(+)	promoter region	TMEM180	TMEM180
chr19:11076755-11077456	-2.61792	5.33221e-05	within:LDLR|NM_000527(+)	within	LDLR
chr22:16007231-16008723	-2.60994	5.48771e-05	within:CECR5|NM_017829(-)//CECR5|NM_033070(-)	within	CECR5
chr19:3911761-3912461	-2.64429	5.58034e-05	within:DAPK3|NM_001348(-)	within	DAPK3
chr10:135082661-135083361	-2.60864	5.60257e-05	within:MTG1|NM_138384(+)	within	MTG1
chr11:61104264-61107314	-2.64665	5.6046e-05	promoter region:SYT7|NM_004200(-)	promoter region	SYT7	SYT7
chr21:44047671-44048371	-2.61429	5.63684e-05	within:RRP1|NM_003683(+)	within	RRP1
chr10:134768505-134769205	-2.61321	5.65381e-05	within:GPR123|NM_001083909(+)	within	GPR123
chr16:84076384-84077084	-2.60821	5.70988e-05	left:FAM92B|NM_198491(372769-)	left	FAM92B
chr2:25207684-25208384	-2.6275	5.74224e-05	within:EFR3B|NM_014971(+)	within	EFR3B
chr4_random:498283-498983	-2.648	5.82775e-05	within:LOC100132288|NM_001033515(-)	within	LOC100132288
chr6:44200913-44205609	-2.61512	5.91859e-05	promoter region:MRPL14|NM_032111(-)//TMEM63B|NM_018426(+)	promoter region	MRPL14	MRPL14
chr1:226575931-226576631	-2.61143	5.93343e-05	within:OBSCN|NM_052843(+)//OBSCN|NM_001098623(+)	within	OBSCN
chr14:102919013-102922461	-2.63008	5.99977e-05	promoter region:MARK3|NM_001128921(+)//MARK3|NM_002376(+)//MARK3|NM_001128918(+)//MARK3|NM_001128919(+)//MARK3|NM_001128920(+)	promoter region	MARK3	MARK3
chr3:49915700-49918750	-2.59687	6.08598e-05	promoter region:MST1R|NM_002447(-)	promoter region	MST1R	MST1R
chr9:134893442-134896492	-2.69488	6.14912e-05	promoter region:GTF3C5|NM_001122823(+)//GTF3C5|NM_012087(+)	promoter region	GTF3C5	GTF3C5
chr20:34877315-34878016	-2.7226	6.19191e-05	within:C20orf117|NM_199181(-)	within	C20orf117
chr15:39972957-39976007	-2.58979	6.23171e-05	promoter region:SPTBN5|NM_016642(-)	promoter region	SPTBN5	SPTBN5
chr15:19336057-19339107	-2.5919	6.23771e-05	promoter region:POTEB|NM_207355(-)	promoter region	POTEB	POTEB
chr2:96890973-96891674	-2.61616	6.3811e-05	within:SEMA4C|NM_017789(-)	within	SEMA4C
chr6:41994502-41999295	3.20389	6.44691e-05	promoter region:MED20|NM_004275(-)//BYSL|NM_004053(+)	promoter region	MED20	MED20
chr3:198179491-198182541	-2.60005	6.44917e-05	promoter region:PIGZ|NM_025163(-)	promoter region	PIGZ	PIGZ
chr5:132034831-132037881	-2.60125	6.47238e-05	promoter region:IL4|NM_172348(+)//IL4|NM_000589(+)	promoter region	IL4	IL4
chr16:31290183-31290884	-2.60479	6.48583e-05	within:ITGAX|NM_000887(+)	within	ITGAX
chr8:37771141-37775258	-2.59098	6.52671e-05	promoter region:GPR124|NM_032777(+)	promoter region	GPR124	GPR124
chr20:62175524-62176387	-2.58776	6.53156e-05	within:RGS19|NM_001039467(-)//RGS19|NM_005873(-)	within	RGS19
chr1:40892231-40892931	-2.64354	6.53609e-05	within:RIMS3|NM_014747(-)	within	RIMS3
chr19:59925355-59928422	-2.62601	6.53934e-05	promoter region:KIR3DL3|NM_153443(+)//KIR3DP1|NM_001015070(+)	promoter region	KIR3DL3	KIR3DL3
chr16:2884132-2884833	-2.62156	6.55628e-05	within:FLYWCH2|NM_001142499(+)//FLYWCH2|NM_001142500(+)//FLYWCH2|NM_138439(+)	within	FLYWCH2
chr17:3045122-3048172	-2.58433	6.62258e-05	promoter region:OR1A2|NM_012352(+)	promoter region	OR1A2	OR1A2
chr17:3545700-3548772	-2.65129	6.62427e-05	promoter region:P2RX5|NM_002561(-)//P2RX5|NM_175080(-)//P2RX5|NM_175081(-)	promoter region	P2RX5	P2RX5
chr11:65500306-65501007	-2.65095	6.64737e-05	within:SART1|NM_005146(+)	within	SART1
chr9:67898368-67899412	-2.62833	6.68155e-05	left:ANKRD20A1|NM_032250//ANKRD20A3|NM_001012419(381788+)	left	ANKRD20A1
chr15:72489857-72490557	-2.5885	6.72289e-05	within:SEMA7A|NM_001146030(-)//SEMA7A|NM_001146029(-)//SEMA7A|NM_003612(-)	within	SEMA7A
chr17:77385605-77388655	-2.59204	6.76513e-05	promoter region:DYSFIP1|NM_001007533(-)	promoter region	DYSFIP1	DYSFIP1
chr11:67189129-67189829	-2.595	6.81979e-05	within:ALDH3B2|NM_000695(-)//ALDH3B2|NM_001031615(-)	within	ALDH3B2
chr1:10647639-10648339	-2.58179	6.87688e-05	within:CASZ1|NM_001079843(-)//CASZ1|NM_017766(-)	within	CASZ1
chr3:198151450-198156301	-2.6925	6.93408e-05	promoter region:NCBP2|NM_007362(-)//LOC152217|NR_024388(+)//NCBP2|NM_001042540(-)	promoter region	NCBP2	NCBP2
chr13:112713989-112715332	-2.57917	6.9854e-05	within:MCF2L|NM_001112732(+)//MCF2L|NM_024979(+)	within	MCF2L
chr17:72824751-72827801	-2.58206	6.99206e-05	promoter region:SEPT9|NM_006640(+)	promoter region	SEPT9	SEPT9
chr22:48436584-48439634	-2.59758	7.04328e-05	promoter region:C22orf34|NR_026997(-)	promoter region	C22orf34	C22orf34
chr15:72882157-72882858	-2.59607	7.0589e-05	left:CSK|NM_001127190//CSK|NM_004383(20680+)	left	CSK
chr5:167621710-167622411	-2.58562	7.22664e-05	within:ODZ2|NM_001122679(+)	within	ODZ2
chr1:19839872-19844510	-2.63225	7.23298e-05	promoter region:NBL1|NM_005380(+)//NBL1|NM_182744(+)	promoter region	NBL1	NBL1
chr22:48268880-48269581	-2.66725	7.24171e-05	left:FAM19A5|NM_015381(918099+)	left	FAM19A5
chr2:132147609-132148309	-2.57795	7.25067e-05	left:CCDC74A|NM_138770(145648+)	left	CCDC74A
chr11:60818327-60821804	-2.5831	7.29389e-05	promoter region:VWCE|NM_152718(-)	promoter region	VWCE	VWCE
chr12:124144071-124144771	-2.58881	7.30675e-05	within:AACS|NM_023928(+)	within	AACS
chr2:10477106-10477806	-2.61839	7.38906e-05	within:HPCAL1|NM_002149(+)//HPCAL1|NM_134421(+)	within	HPCAL1
chr6:44232085-44235135	-2.57625	7.4365e-05	promoter region:CAPN11|NM_007058(+)	promoter region	CAPN11	CAPN11
chr7:72270169-72273219	-2.60056	7.4736e-05	promoter region:NCF1B|NR_003186(+)	promoter region	NCF1B	NCF1B
chr22:35875298-35878348	-2.58497	7.4993e-05	promoter region:IL2RB|NM_000878(-)	promoter region	IL2RB	IL2RB
chr20:3012760-3015810	-2.61752	7.5998e-05	promoter region:AVP|NM_000490(-)	promoter region	AVP	AVP
chrX:70242535-70245585	-2.56668	7.60397e-05	promoter region:CXorf65|NM_001025265(-)	promoter region	CXorf65	CXorf65
chr3:53007654-53008355	-2.57125	7.78382e-05	within:SFMBT1|NM_016329(-)//SFMBT1|NM_001005158(-)//SFMBT1|NM_001005159(-)	within	SFMBT1
chr7:158011482-158012182	-2.60286	7.79064e-05	within:PTPRN2|NM_130842(-)//PTPRN2|NM_130843(-)//PTPRN2|NM_002847(-)	within	PTPRN2
chr1:1590619-1591319	-2.60054	7.83521e-05	within:CDK11B|NM_033488(-)//CDK11B|NM_033487(-)//CDK11B|NM_033489(-)//CDK11B|NM_033486(-)//CDK11B|NM_033493(-)//CDK11B|NM_033492(-)//SLC35E2B|NM_001110781(-)	within	CDK11B
chr19:3048328-3049029	-2.58194	7.86398e-05	within:GNA11|NM_002067(+)	within	GNA11
chr5:149492258-149492958	-2.57214	7.88777e-05	within:PDGFRB|NM_002609(-)	within	PDGFRB
chr22:48483847-48484547	-2.60524	7.97536e-05	left:C22orf34|NR_026997(46653-)	left	C22orf34
chr11:61244470-61245171	-2.56357	8.01799e-05	within:DAGLA|NM_006133(+)	within	DAGLA
chr16:87314824-87315524	-2.59654	8.0256e-05	within:FAM38A|NM_001142864(-)	within	FAM38A
chr1:35430054-35433770	-2.62438	8.04068e-05	promoter region:SFPQ|NM_005066(-)	promoter region	SFPQ	SFPQ
chr9:133172942-133173643	-2.55961	8.06376e-05	within:PPAPDC3|NM_032728(+)	within	PPAPDC3
chr21:46635318-46636019	-2.6	8.09242e-05	within:PCNT|NM_006031(+)	within	PCNT
chr18:75006885-75007585	-2.58775	8.11699e-05	within:ATP9B|NM_198531(+)	within	ATP9B
chrX:52966632-52967358	-2.63621	8.2337e-05	left:FAM156B|NM_001099684(21499+)	left	FAM156B
chr20:1039465-1042515	-2.57839	8.29149e-05	promoter region:PSMF1|NM_178578(+)	promoter region	PSMF1	PSMF1
chr1:218440031-218443081	3.09917	8.33818e-05	promoter region:SNORA36B|NR_002994(-)	promoter region	SNORA36B	SNORA36B
chr5:17328153-17329240	-2.61183	8.41473e-05	within:BASP1|NM_006317(+)	within	BASP1
chr20:44007978-44008679	-2.55592	8.45377e-05	within:PCIF1|NM_022104(+)	within	PCIF1
chr9:138339312-138344040	-2.55731	8.57133e-05	promoter region:GPSM1|NM_015597(+)//LOC26102|NR_026964(-)//GPSM1|NM_001145638(+)	promoter region	GPSM1	GPSM1
chr11:1983100-1983801	-2.54864	8.58157e-05	left:H19|NR_002196(7459-)	left	H19
chr19:7520785-7521998	-2.55061	8.63968e-05	within:PNPLA6|NM_006702(+)	within	PNPLA6
chr16:2068490-2069765	-2.55737	8.65554e-05	within:TSC2|NM_000548(+)//TSC2|NM_001077183(+)//TSC2|NM_001114382(+)	within	TSC2
chr1:16217262-16221682	-2.55667	8.66184e-05	promoter region:CLCNKA|NM_001042704(+)//CLCNKA|NM_004070(+)//HSPB7|NM_014424(-)	promoter region	CLCNKA	CLCNKA
chr5:180397390-180400440	-2.58888	8.67136e-05	promoter region:BTNL9|NM_152547(+)	promoter region	BTNL9	BTNL9
chr19:63583591-63586641	-2.5508	8.7109e-05	promoter region:ZNF837|NM_138466(-)//ZNF837|NM_001129730(-)	promoter region	ZNF837	ZNF837
chr22:34976622-34979672	-2.57064	8.73477e-05	promoter region:APOL1|NM_003661(+)//APOL1|NM_001136541(+)//APOL1|NM_001136540(+)//APOL1|NM_145343(+)	promoter region	APOL1	APOL1
chr1:199462421-199463122	-2.60477	8.74865e-05	within:IGFN1|NM_178275(+)	within	IGFN1
chr9:123561867-123562567	-2.56071	8.75625e-05	within:DAB2IP|NM_138709(+)//DAB2IP|NM_032552(+)	within	DAB2IP
chr21:35015534-35018584	-2.55986	8.82387e-05	promoter region:NCRNA00160|NR_024351(+)	promoter region	NCRNA00160	NCRNA00160
chr1:149636224-149639274	-2.56225	8.85551e-05	promoter region:PSMB4|NM_002796(+)	promoter region	PSMB4	PSMB4
chr11:46120977-46121678	-2.589	8.87552e-05	left:PHF21A|NM_016621//PHF21A|NM_001101802(21416-)	left	PHF21A
chr21:32594431-32595131	-2.58214	8.88223e-05	within:MRAP|NM_206898(+)//MRAP|NM_178817(+)	within	MRAP
chr11_random:1518-2219	-2.61313	9.01939e-05	left:	left	left:
chr1:202492999-202493699	-2.54571	9.0789e-05	within:PLEKHA6|NM_014935(-)	within	PLEKHA6
chr1:6575772-6576473	-2.54312	9.09391e-05	within:KLHL21|NM_014851(-)	within	KLHL21
chr15:26132814-26133514	-2.54708	9.10469e-05	within:HERC2|NM_004667(-)	within	HERC2
chr1:46742814-46745864	-2.55142	9.13023e-05	promoter region:DMBX1|NM_172225(+)//DMBX1|NM_147192(+)	promoter region	DMBX1	DMBX1
chr17:39093847-39097228	-2.56161	9.22237e-05	promoter region:MEOX1|NM_013999(-)//MEOX1|NM_004527(-)//MEOX1|NM_001040002(-)	promoter region	MEOX1	MEOX1
chr11:69334121-69334822	-2.53935	9.32958e-05	within:FGF3|NM_005247(-)	within	FGF3
chr7:5326930-5327631	-2.55646	9.37517e-05	within:TNRC18|NM_001080495(-)	within	TNRC18
chr11:62170070-62173120	-2.62308	9.39711e-05	promoter region:GANAB|NM_198335(-)//GANAB|NM_198334(-)	promoter region	GANAB	GANAB
chr9:139117418-139118118	-2.53688	9.4675e-05	within:MAN1B1|NM_016219(+)	within	MAN1B1
chr19:1255564-1256264	-2.54721	9.59462e-05	left:EFNA2|NM_001405(18397+)	left	EFNA2
chr20:61335280-61338330	-2.55068	9.61793e-05	promoter region:BIRC7|NM_022161(+)//BIRC7|NM_139317(+)	promoter region	BIRC7	BIRC7
chr1:1454170-1454870	-2.58027	9.68034e-05	within:ATAD3A|NM_018188(+)	within	ATAD3A
chr17:1784123-1784823	-2.60204	9.68812e-05	left:RPA1|NM_002945(104101+)	left	RPA1
chr18:42352437-42355487	-2.59372	9.69371e-05	promoter region:LOXHD1|NM_001145473(-)	promoter region	LOXHD1	LOXHD1
chr9:67903252-67903952	-2.58593	9.72339e-05	left:ANKRD20A1|NM_032250//ANKRD20A3|NM_001012419(386672+)	left	ANKRD20A1
chr7:35973536-35974679	-2.53638	9.74174e-05	left:SEPT7|NM_001011553//SEPT7|NM_001788(166385+)	left	SEPT7
chr17:21259243-21260634	-2.55118	9.85243e-05	within:KCNJ12|NM_021012(+)	within	KCNJ12
chr20:5242405-5245798	-2.68375	9.87534e-05	promoter region:PROKR2|NM_144773(-)	promoter region	PROKR2	PROKR2
chr19:51422408-51425458	-2.53682	9.95277e-05	promoter region:IGFL1|NM_198541(+)	promoter region	IGFL1	IGFL1
chr12:6803351-6804052	-2.53875	0.000101573	within:GPR162|NM_019858(+)//GPR162|NM_014449(+)	within	GPR162
chrX:109130577-109133627	-2.56162	0.000101735	promoter region:TMEM164|NM_032227(+)	promoter region	TMEM164	TMEM164
chr21:43545175-43545876	-2.64521	0.000102041	left:CRYAA|NM_000394(82966+)	left	CRYAA
chr14:104356142-104359192	-2.5529	0.000102791	promoter region:MGC23270|NR_024396(+)	promoter region	MGC23270	MGC23270
chr19:776390-779440	-2.6082	0.000103568	promoter region:AZU1|NM_001700(+)	promoter region	AZU1	AZU1
chr10:13554962-13555662	-2.53482	0.000104402	within:BEND7|NM_001100912(-)//BEND7|NM_152751(-)	within	BEND7
chr9:138350873-138351573	-2.55275	0.000105164	within:GPSM1|NM_001145638(+)//GPSM1|NM_015597(+)	within	GPSM1
chr9:135434556-135437606	-2.53408	0.00010565	promoter region:FAM163B|NM_001080515(-)	promoter region	FAM163B	FAM163B
chr15:72921995-72925045	-2.5272	0.000105671	promoter region:ULK3|NM_001099436(-)	promoter region	ULK3	ULK3
chr9:138963963-138967607	-2.55208	0.000105726	promoter region:LCN12|NM_178536(+)	promoter region	LCN12	LCN12
chr6:166745773-166746473	-2.52486	0.000106343	within:RPS6KA2|NM_001006932(-)//RPS6KA2|NM_021135(-)	within	RPS6KA2
chr9:139124741-139125441	-2.53319	0.000106387	left:MAN1B1|NM_016219(23504+)	left	MAN1B1
chr7:65946638-65949688	-2.55887	0.000106515	promoter region:LOC729156|NR_003934(-)	promoter region	LOC729156	LOC729156
chr3:140130219-140130920	-2.56071	0.000106715	left:PIK3CB|NM_006219(169344-)	left	PIK3CB
chr15:99235091-99238656	-2.5493	0.000106717	promoter region:ALDH1A3|NM_000693(+)	promoter region	ALDH1A3	ALDH1A3
chr6:168715365-168716958	-2.54333	0.000107182	within:SMOC2|NM_022138(+)	within	SMOC2
chr19:5629594-5634351	-2.52739	0.000107377	promoter region:HSD11B1L|NM_198533(+)//HSD11B1L|NM_198704(+)//C19orf70|NM_205767(-)//HSD11B1L|NM_198706(+)//HSD11B1L|NM_198708(+)//HSD11B1L|NM_198707(+)//HSD11B1L|NM_198705(+)	promoter region	HSD11B1L	HSD11B1L
chr9:130880763-130883813	-2.532	0.000107687	promoter region:DOLPP1|NM_020438(+)//DOLPP1|NM_001135917(+)	promoter region	DOLPP1	DOLPP1
chr7:100322124-100322824	-2.68812	0.000107811	within:SRRT|NM_001128853(+)//SRRT|NM_001128854(+)//SRRT|NM_001128852(+)//SRRT|NM_015908(+)	within	SRRT
chr4:8358444-8359144	-2.54157	0.000108244	within:HTRA3|NM_053044(+)	within	HTRA3
chr12:131079281-131082331	-2.53748	0.000108336	promoter region:SNORA49|NR_002979(+)	promoter region	SNORA49	SNORA49
chr17:40189653-40192703	-2.55764	0.000109018	promoter region:ADAM11|NM_002390(+)	promoter region	ADAM11	ADAM11
chr1:45036182-45039370	-2.59951	0.000109087	promoter region:PLK3|NM_004073(+)	promoter region	PLK3	PLK3
chr10:123342861-123350402	-2.55766	0.000109523	promoter region:FGFR2|NM_001144919(-)//FGFR2|NM_001144916(-)//FGFR2|NM_001144917(-)//FGFR2|NM_001144914(-)//FGFR2|NM_022970(-)//FGFR2|NM_001144915(-)//FGFR2|NM_001144918(-)//FGFR2|NM_001144913(-)//FGFR2|NM_000141(-)	promoter region	FGFR2	FGFR2
chr22:17545061-17548741	-2.54033	0.000109735	promoter region:SLC25A1|NM_005984(-)	promoter region	SLC25A1	SLC25A1
chr21:46369615-46370640	-2.53342	0.000110084	within:COL6A2|NM_001849(+)//COL6A2|NM_058175(+)//COL6A2|NM_058174(+)	within	COL6A2
chr19:54556413-54559966	-2.55161	0.000110383	promoter region:DKKL1|NM_014419(+)//TEAD2|NM_003598(-)	promoter region	DKKL1	DKKL1
chr1:6124475-6125176	-2.56396	0.000110585	within:CHD5|NM_015557(-)	within	CHD5
chr21:44888318-44891368	-2.59987	0.000110667	promoter region:KRTAP10-11|NM_198692(+)	promoter region	KRTAP10-11	KRTAP10-11
chr7:74704667-74707717	-2.56271	0.000111069	promoter region:GATSL2|NM_001145064(-)	promoter region	GATSL2	GATSL2
chr21:43655076-43655777	-2.54263	0.000111317	left:CRYAA|NM_000394(192867+)	left	CRYAA
chr19:10892714-10893414	-2.53143	0.000111361	within:CARM1|NM_199141(+)	within	CARM1
chr5:150009044-150009744	-2.54238	0.000111963	within:SYNPO|NM_007286(+)//SYNPO|NM_001109974(+)	within	SYNPO
chr21:42033985-42035017	-2.52534	0.000111971	within:RIPK4|NM_020639(-)	within	RIPK4
chrY:24742156-24745206	-2.53488	0.000112486	promoter region:CSPG4P2Y|NR_002194(-)//CSPG4P1Y|NR_001554(-)	promoter region	CSPG4P2Y	CSPG4P2Y
chr4:8642894-8645944	-2.54981	0.000113324	promoter region:CPZ|NM_001014448(+)//CPZ|NM_003652(+)//CPZ|NM_001014447(+)	promoter region	CPZ	CPZ
chr1:26057825-26060875	-2.51494	0.000113569	promoter region:C1orf135|NM_024037(-)	promoter region	C1orf135	C1orf135
chr8:145119018-145124293	-2.5492	0.000113668	promoter region:PLEC|NM_201378(-)//PLEC|NM_000445(-)	promoter region	PLEC	PLEC
chr5:1335596-1336297	-2.52835	0.000113803	within:TERT|NM_198253(-)//TERT|NM_198255(-)	within	TERT
chr14:20179080-20182130	-2.53512	0.000114229	promoter region:OR6S1|NM_001001968(-)	promoter region	OR6S1	OR6S1
chr19:806486-807186	-2.51598	0.000114458	within:ELANE|NM_001972(+)	within	ELANE
chr22:49239455-49240155	-2.52351	0.000114849	within:SBF1|NM_002972(-)	within	SBF1
chr11:70911014-70911714	-2.55725	0.000115199	left:NADSYN1|NM_018161(69150+)	left	NADSYN1
chr19:2205734-2208784	-2.51272	0.000116858	promoter region:JSRP1|NM_144616(-)	promoter region	JSRP1	JSRP1
chr7:273555-274255	-2.5292	0.000117026	left:	left	left:
chr22:21813631-21818122	-2.51903	0.00011751	promoter region:RAB36|NM_004914(+)//RTDR1|NM_014433(-)	promoter region	RAB36	RAB36
chr9:137290223-137291050	-2.53319	0.000119077	left:OLFM1|NM_006334(183300+)	left	OLFM1
chr16:82883461-82886511	-2.56392	0.00011943	promoter region:WFDC1|NM_021197(+)	promoter region	WFDC1	WFDC1
chr20:60345157-60345857	-2.53536	0.000119503	within:LAMA5|NM_005560(-)	within	LAMA5
chr15:84113157-84114051	-2.51007	0.000119541	within:KLHL25|NM_022480(-)	within	KLHL25
chr19:17304963-17305663	-2.53121	0.000119627	within:ANO8|NM_020959(-)	within	ANO8
chr5:60075118-60075818	-2.51625	0.000119805	left:DEPDC1B|NM_001145208//DEPDC1B|NM_018369(43368-)	left	DEPDC1B
chr17:4281527-4284577	-2.50934	0.000121097	promoter region:SPNS3|NM_182538(+)	promoter region	SPNS3	SPNS3
chr19:11521060-11521760	-2.5032	0.000121694	within:CNN1|NM_001299(+)	within	CNN1
chr22:49000973-49001674	-2.53979	0.000121939	within:TUBGCP6|NM_020461(-)	within	TUBGCP6
chr9:35816781-35821184	-2.57435	0.000122293	promoter region:TMEM8B|NM_016446(+)//TMEM8B|NM_001042589(+)//C9orf128|NM_001012446(-)//TMEM8B|NM_001042590(+)	promoter region	TMEM8B	TMEM8B
chrX:2428315-2431455	-2.58708	0.000122336	promoter region:ZBED1|NM_004729(-)//DHRSX|NM_145177(-)	promoter region	ZBED1	ZBED1
chr19:5044199-5044899	-2.50871	0.000122786	within:KDM4B|NM_015015(+)	within	KDM4B
chr10:135020635-135023959	-2.50807	0.000124183	promoter region:C10orf125|NM_001098483(-)//C10orf125|NM_198472(-)	promoter region	C10orf125	C10orf125
chr20:61348057-61348758	-2.50156	0.000125338	within:NKAIN4|NM_152864(-)	within	NKAIN4
chr2:241021347-241024993	-2.512	0.000125542	promoter region:GPC1|NM_002081(+)	promoter region	GPC1	GPC1
chr3:184362751-184365801	-2.51875	0.000125769	promoter region:LAMP3|NM_014398(-)	promoter region	LAMP3	LAMP3
chrX:72215242-72218516	-2.53458	0.000126642	promoter region:PABPC1L2A|NM_001012977(-)	promoter region	PABPC1L2A	PABPC1L2A
chr18:72735693-72736394	-2.56306	0.000127355	within:ZNF236|NM_007345(+)	within	ZNF236
chr2:242458118-242461168	-2.4981	0.000127488	promoter region:C2orf85|NM_173821(+)	promoter region	C2orf85	C2orf85
chr9:128492686-128493387	-2.49548	0.000127626	within:LMX1B|NM_002316(+)	within	LMX1B
chrX:37964465-37967515	-2.5052	0.000127818	promoter region:SRPX|NM_006307(-)	promoter region	SRPX	SRPX
chr2:241554130-241554831	-2.507	0.000128437	left:C2orf54|NM_001085437(69884-)	left	C2orf54
chr12:131255641-131258966	-2.5525	0.000129502	promoter region:GALNT9|NM_021808(-)	promoter region	GALNT9	GALNT9
chr16:2116879-2117580	-2.49406	0.000129595	within:PKD1|NM_000296(-)//PKD1|NM_001009944(-)	within	PKD1
chr19:55675426-55676126	-2.49655	0.000129975	within:C19orf63|NM_175063(+)//C19orf63|NM_206538(+)	within	C19orf63
chr17:8181472-8184522	-2.52057	0.000130058	promoter region:ODF4|NM_153007(+)	promoter region	ODF4	ODF4
chr7:2152164-2152864	-2.49536	0.000130138	within:MAD1L1|NM_003550(-)//MAD1L1|NM_001013837(-)//MAD1L1|NM_001013836(-)	within	MAD1L1
chrX:152250366-152253416	-2.56839	0.000130745	promoter region:ZNF275|NM_001080485(+)	promoter region	ZNF275	ZNF275
chr1:53330753-53331453	-2.56086	0.000130914	within:SLC1A7|NM_006671(-)	within	SLC1A7
chrX:153184162-153187212	-2.52638	0.000131201	promoter region:TKTL1|NM_001145934(+)	promoter region	TKTL1	TKTL1
chr7:99806563-99809613	-2.5135	0.00013156	promoter region:PILRA|NM_178272(+)//PILRA|NM_013439(+)//PILRA|NM_178273(+)	promoter region	PILRA	PILRA
chr2:127902353-127903054	-2.51066	0.00013168	within:PROC|NM_000312(+)	within	PROC
chr19:50107320-50110370	-2.54712	0.000131851	promoter region:APOC1|NM_001645(+)	promoter region	APOC1	APOC1
chr9:138710070-138710770	-2.49607	0.000131909	left:AGPAT2|NM_006412//AGPAT2|NM_001012727(8338-)	left	AGPAT2
chrX:152900619-152901319	-2.49738	0.000131975	within:TMEM187|NM_003492(+)	within	TMEM187
chr16:83964596-83965296	-2.49633	0.000132098	left:FAM92B|NM_198491(260981-)	left	FAM92B
chr18:12767454-12768155	-2.49833	0.000133613	left:PSMG2|NM_020232(74391+)	left	PSMG2
chr6:33822130-33825180	-2.49303	0.000133679	promoter region:IP6K3|NM_001142883(-)//IP6K3|NM_054111(-)	promoter region	IP6K3	IP6K3
chr16:3484812-3487862	-2.49826	0.000134994	promoter region:C16orf90|NM_001080524(-)	promoter region	C16orf90	C16orf90
chr11:93773623-93776673	-2.48634	0.000135067	promoter region:GPR83|NM_016540(-)	promoter region	GPR83	GPR83
chr7:2386250-2386950	-2.51388	0.000135492	left:EIF3B|NM_001037283//EIF3B|NM_003751(25251+)	left	EIF3B
chr8:22134818-22135518	-2.53238	0.000135945	within:PHYHIP|NM_014759(-)//PHYHIP|NM_001099335(-)	within	PHYHIP
chr1:152197057-152200107	-2.50756	0.000136753	promoter region:CRTC2|NM_181715(-)	promoter region	CRTC2	CRTC2
chr9:136849597-136850298	-2.50175	0.000137139	within:COL5A1|NM_000093(+)	within	COL5A1
chr2:128097857-128098558	-2.52344	0.000137373	within:MYO7B|NM_001080527(+)	within	MYO7B
chr17:40923283-40926333	-2.57802	0.000139001	promoter region:PLEKHM1|NM_014798(-)	promoter region	PLEKHM1	PLEKHM1
chr9:92601392-92604637	-2.4975	0.00013915	promoter region:SYK|NR_024156(+)//SYK|NM_003177(+)//SYK|NM_001135052(+)	promoter region	SYK	SYK
chr11:1145318-1146019	-2.49869	0.000139336	within:MUC5AC|NM_017511(+)	within	MUC5AC
chr19:261070-261770	-2.49446	0.000139777	within:MIER2|NM_017550(-)	within	MIER2
chr16:62017-68778	-2.48743	0.000139853	promoter region:MPG|NM_001015054(+)//MPG|NM_001015052(+)//RHBDF1|NM_022450(-)//MPG|NM_002434(+)	promoter region	MPG	MPG
chr5:1518915-1520245	-2.50256	0.00014095	within:LPCAT1|NM_024830(-)	within	LPCAT1
chr21:37961405-37962105	-2.56774	0.000141412	within:KCNJ6|NM_002240(-)	within	KCNJ6
chr17:37220047-37224417	-2.54103	0.00014152	promoter region:FKBP10|NM_021939(+)//SC65|NM_006455(-)	promoter region	FKBP10	FKBP10
chr17:37373105-37374228	-2.49143	0.000141952	within:CNP|NM_033133(+)	within	CNP
chr19:14000821-14004038	-2.52578	0.000142559	promoter region:IL27RA|NM_004843(+)	promoter region	IL27RA	IL27RA
chr19:56334929-56337979	-2.48888	0.000143121	promoter region:SIGLEC7|NM_014385(+)//SIGLEC7|NM_016543(+)	promoter region	SIGLEC7	SIGLEC7
chr4:1957290-1958058	-2.48146	0.000143699	within:WHSC2|NM_005663(-)	within	WHSC2
chr7:99522078-99525128	-2.55917	0.000144246	promoter region:COPS6|NM_006833(+)	promoter region	COPS6	COPS6
chr9:125172596-125173297	-2.4825	0.000144476	within:CRB2|NM_173689(+)	within	CRB2
chr4:3489304-3490004	-2.49357	0.000144641	within:LRPAP1|NM_002337(-)	within	LRPAP1
chr16:87533835-87537549	-2.52831	0.000144872	promoter region:CBFA2T3|NM_175931(-)	promoter region	CBFA2T3	CBFA2T3
chrX:142549076-142553125	-2.50296	0.000145378	promoter region:SLITRK4|NM_173078(-)	promoter region	SLITRK4	SLITRK4
chr7:5380153-5380854	-2.52031	0.000146709	within:TNRC18|NM_001080495(-)	within	TNRC18
chr5:178345769-178346470	-2.47781	0.000147701	within:GRM6|NM_000843(-)	within	GRM6
chr5:141213564-141214264	-2.51089	0.000147708	within:PCDH1|NM_032420(-)	within	PCDH1
chr16:86777432-86778132	-2.4985	0.000148182	left:BANP|NM_079837//BANP|NM_017869(234894+)	left	BANP
chr17:43389499-43392549	-2.47814	0.000148187	promoter region:PRR15L|NM_024320(-)	promoter region	PRR15L	PRR15L
chr16:82772086-82772787	-2.50281	0.000150604	within:TAF1C|NM_139353(-)//TAF1C|NM_005679(-)	within	TAF1C
chr16:55961474-55964524	-2.50042	0.000150709	promoter region:CX3CL1|NM_002996(+)	promoter region	CX3CL1	CX3CL1
chr19:45084176-45084877	-2.53183	0.000151543	within:FCGBP|NM_003890(-)	within	FCGBP
chr19:12628514-12629215	-2.48687	0.000151668	within:MAN2B1|NM_000528(-)	within	MAN2B1
chr7:1986107-1986808	-2.48269	0.00015246	within:MAD1L1|NM_003550(-)//MAD1L1|NM_001013837(-)//MAD1L1|NM_001013836(-)	within	MAD1L1
chr19:40902296-40902997	-2.62938	0.000152539	within:MLL4|NM_014727(+)	within	MLL4
chr16:87570292-87573342	-2.47872	0.000152558	promoter region:CBFA2T3|NM_005187(-)	promoter region	CBFA2T3	CBFA2T3
chr4:941580-942280	-2.48037	0.000152792	within:TMEM175|NM_032326(+)	within	TMEM175
chr21:14305192-14305893	-2.47323	0.000152891	left:C21orf81|NR_027270(30556-)	left	C21orf81
chr8:1484138-1485291	-2.49247	0.000153209	within:DLGAP2|NM_004745(+)	within	DLGAP2
chr10:134455574-134456378	-2.48327	0.000153449	left:NKX6-2|NM_177400(6047-)	left	NKX6-2
chr1:3501423-3502124	-2.51022	0.000154124	within:MEGF6|NM_001409(-)	within	MEGF6
chr7:157395551-157396252	-2.5453	0.000154149	within:PTPRN2|NM_130842(-)//PTPRN2|NM_130843(-)//PTPRN2|NM_002847(-)	within	PTPRN2
chr2:70900630-70903680	-2.48936	0.000154607	promoter region:CLEC4F|NM_173535(-)	promoter region	CLEC4F	CLEC4F
chr19:11548943-11553241	-2.49479	0.000155504	promoter region:ACP5|NM_001611(-)//ACP5|NM_001111034(-)//ACP5|NM_001111036(-)//ACP5|NM_001111035(-)	promoter region	ACP5	ACP5
chrX:152748140-152751637	-2.47164	0.000155746	promoter region:PDZD4|NM_032512(-)	promoter region	PDZD4	PDZD4
chr9:94858369-94861419	-2.48266	0.000155977	promoter region:SUSD3|NM_145006(+)	promoter region	SUSD3	SUSD3
chr2:23705119-23705820	-2.563	0.000156036	left:APOB|NM_000384(2584669-)	left	APOB
chr1:152011951-152015322	-2.65774	0.000156129	promoter region:SLC27A3|NM_024330(+)	promoter region	SLC27A3	SLC27A3
chr9:139449053-139449753	-2.4781	0.000156688	within:ENTPD8|NM_001033113(-)//ENTPD8|NM_198585(-)	within	ENTPD8
chr3:52542049-52546573	-2.49063	0.000157247	promoter region:C3orf78|NM_001124767(+)//NT5DC2|NM_001134231(-)//NT5DC2|NM_022908(-)	promoter region	C3orf78	C3orf78
chr15:66284892-66287942	-2.48534	0.000157329	promoter region:CALML4|NM_033429(-)//CALML4|NM_001031733(-)	promoter region	CALML4	CALML4
chr19:17829286-17835006	-2.48985	0.000157503	promoter region:RPL18A|NM_000980(+)//RPL18AP3|NR_001593(+)//SNORA68|NR_000012(+)	promoter region	RPL18A	RPL18A
chr9:126308910-126311960	-2.49667	0.000158184	promoter region:NR5A1|NM_004959(-)	promoter region	NR5A1	NR5A1
chr2:241215027-241218077	-2.47448	0.000158993	promoter region:GPR35|NM_005301(+)	promoter region	GPR35	GPR35
chr16:87763223-87766273	-2.47926	0.000159005	promoter region:CDH15|NM_004933(+)	promoter region	CDH15	CDH15
chr20:61648691-61651741	-2.48997	0.000159049	promoter region:SRMS|NM_080823(-)	promoter region	SRMS	SRMS
chr16:87292371-87293071	-2.48121	0.000159236	within:RNF166|NM_178841(-)	within	RNF166
chr22:25159573-25160273	-2.47333	0.0001602	within:ASPHD2|NM_020437(+)	within	ASPHD2
chr17:19252675-19255725	-2.46415	0.000160291	promoter region:RNF112|NM_007148(+)	promoter region	RNF112	RNF112
chr1:85515561-85518611	-2.51587	0.000160615	promoter region:BCL10|NM_003921(-)	promoter region	BCL10	BCL10
chr19:5061370-5062070	-2.48857	0.000161031	within:KDM4B|NM_015015(+)	within	KDM4B
chr4:6975952-6976652	-2.48661	0.000161506	within:TBC1D14|NM_020773(+)//TBC1D14|NM_001113361(+)	within	TBC1D14
chr7:75876338-75879388	-2.50927	0.000161548	promoter region:SRCRB4D|NM_080744(-)	promoter region	SRCRB4D	SRCRB4D
chr19:14552455-14555505	-2.52787	0.000161876	promoter region:CLEC17A|NM_207390(+)	promoter region	CLEC17A	CLEC17A
chr17:76058838-76059538	-2.50931	0.000161895	within:NPTX1|NM_002522(-)	within	NPTX1
chr9:140060888-140061588	-2.47793	0.000165083	within:CACNA1B|NM_000718(+)	within	CACNA1B
chr16:14832703-14835753	-2.5025	0.000166844	promoter region:NOMO1|NM_014287(+)	promoter region	NOMO1	NOMO1
chr20:61165848-61166548	-2.4992	0.000167199	left:BHLHE23|NM_080606(57016-)	left	BHLHE23
chr9:129728981-129732031	-2.46913	0.000167328	promoter region:PIP5KL1|NM_173492(-)	promoter region	PIP5KL1	PIP5KL1
chr14:105061557-105067459	-2.61183	0.000168511	promoter region:TMEM121|NM_025268(+)	promoter region	TMEM121	TMEM121
chr11:45895640-45901349	-2.45777	0.000168802	promoter region:PEX16|NM_004813(-)//PEX16|NM_057174(-)//GYLTL1B|NM_152312(+)	promoter region	PEX16	PEX16
chr10:128183061-128183761	-2.47845	0.000169221	within:C10orf90|NM_001004298(-)	within	C10orf90
chr19:44426841-44431128	-2.48045	0.000170903	promoter region:IL28B|NM_172139(-)	promoter region	IL28B	IL28B
chr6:170527931-170528928	-2.45583	0.000170958	within:FAM120B|NM_032448(+)	within	FAM120B
chr6:3201720-3204770	-2.46497	0.000172061	promoter region:PSMG4|NM_001135750(+)//PSMG4|NM_001128592(+)//PSMG4|NM_001128591(+)	promoter region	PSMG4	PSMG4
chr22:17658629-17661679	-2.466	0.000172702	promoter region:CLTCL1|NM_007098(-)	promoter region	CLTCL1	CLTCL1
chr9:139472639-139476047	-2.46823	0.000173336	promoter region:NELF|NM_001130970(-)//NELF|NM_001130971(-)//NELF|NM_001130969(-)//NELF|NM_015537(-)	promoter region	NELF	NELF
chr7:555404-556105	-2.48142	0.000173642	left:PDGFA|NM_033023//PDGFA|NM_002607(29397-)	left	PDGFA
chr6:107496655-107498492	-2.46644	0.000174071	within:BEND3|NM_001080450(-)	within	BEND3
chr14:104891733-104893020	-2.45186	0.000174143	within:PACS2|NM_001100913(+)//PACS2|NM_015197(+)	within	PACS2
chr12:131382187-131382888	-2.45746	0.00017619	within:GALNT9|NM_001122636(-)	within	GALNT9
chr6:29708055-29711381	-2.47301	0.000177373	promoter region:GABBR1|NM_021905(-)//GABBR1|NM_021904(-)//GABBR1|NM_001470(-)	promoter region	GABBR1	GABBR1
chr19:60561958-60562659	-2.46406	0.0001788	within:FAM71E2|NM_001145402(-)	within	FAM71E2
chr19:699705-702755	-2.48369	0.000179995	promoter region:C19orf21|NM_173481(+)	promoter region	C19orf21	C19orf21
chrY:26036002-26039052	-2.45331	0.000181028	promoter region:CSPG4P2Y|NR_002194(+)//CSPG4P1Y|NR_001554(+)	promoter region	CSPG4P2Y	CSPG4P2Y
chr19:1904550-1907988	-2.45088	0.000181033	promoter region:C19orf34|NM_152771(-)	promoter region	C19orf34	C19orf34
chr5:7446902-7450022	-2.46465	0.000181466	promoter region:ADCY2|NM_020546(+)	promoter region	ADCY2	ADCY2
chr19:7596557-7597257	-2.44821	0.00018198	within:XAB2|NM_020196(-)	within	XAB2
chr11:49871383-49872084	-2.55976	0.000182017	left:LOC440040|NR_027044(334728+)	left	LOC440040
chrX:119917017-119920575	2.96833	0.000182282	promoter region:CT47A7|NM_001080140(-)	promoter region	CT47A7	CT47A7
chr4:3218124-3221245	-2.44656	0.000182615	promoter region:C4orf44|NM_001042690(+)//C4orf44|NM_001012982(+)	promoter region	C4orf44	C4orf44
chr19:11145877-11146577	-2.44992	0.000183207	within:KANK2|NM_015493(-)//KANK2|NM_001136191(-)	within	KANK2
chr9:138903978-138904679	-2.4936	0.000183648	within:TRAF2|NM_021138(+)	within	TRAF2
chr2:241584487-241587537	-2.45958	0.000184205	promoter region:SNED1|NM_001080437(+)	promoter region	SNED1	SNED1
chr1:200401361-200404411	-2.46013	0.000184356	promoter region:PTPRVP|NR_002930(+)	promoter region	PTPRVP	PTPRVP
chr12:131344027-131344727	-2.44707	0.000184565	within:GALNT9|NM_001122636(-)	within	GALNT9
chr11:66947764-66948465	-2.44362	0.000187175	within:CARNS1|NM_020811(+)	within	CARNS1
chr19:566691-574505	-2.45022	0.000188374	left:HCN2|NM_001194(25799+)	left	HCN2
chr1:152180734-152181435	-2.46621	0.000188534	within:DENND4B|NM_014856(-)	within	DENND4B
chr5:730624-731324	-2.46036	0.000188933	within:TPPP|NM_007030(-)	within	TPPP
chr9:130747357-130752273	-2.44633	0.00018988	promoter region:DOLK|NM_014908(-)//NUP188|NM_015354(+)	promoter region	DOLK	DOLK
chr9:125141378-125142079	-2.47094	0.000190861	left:STRBP|NM_018387(70714-)	left	STRBP
chr4:189317691-189318392	-2.56511	0.000191913	left:TRIML1|NM_178556(20100+)	left	TRIML1
chr1:6472617-6476787	-2.51958	0.000191966	promoter region:PLEKHG5|NM_020631(-)//PLEKHG5|NM_001042664(-)	promoter region	PLEKHG5	PLEKHG5
chr16:65984312-65987362	-2.47714	0.000192773	promoter region:TPPP3|NM_015964(-)//TPPP3|NM_016140(-)	promoter region	TPPP3	TPPP3
chr19:10684398-10685098	-2.45979	0.000193014	left:QTRT1|NM_031209(11287+)	left	QTRT1
chr7:285611-288882	-2.45283	0.000193025	promoter region:FAM20C|NM_020223(+)	promoter region	FAM20C	FAM20C
chr13:112683427-112684128	-2.46475	0.000193216	within:MCF2L|NM_001112732(+)//MCF2L|NM_024979(+)	within	MCF2L
chr5:179151151-179154201	-2.44084	0.000193252	promoter region:LTC4S|NM_145867(+)	promoter region	LTC4S	LTC4S
chr2:233094858-233099775	-2.43982	0.000193902	promoter region:CHRND|NM_000751(+)	promoter region	CHRND	CHRND
chr1:16240393-16243443	-2.44509	0.000194106	promoter region:CLCNKB|NM_000085(+)	promoter region	CLCNKB	CLCNKB
chr13:110852185-110852886	-2.51467	0.00019441	left:C13orf16|NM_152324(81170+)	left	C13orf16
chr6:44340791-44343943	-2.46501	0.000194749	promoter region:NFKBIE|NM_004556(-)	promoter region	NFKBIE	NFKBIE
chr18:15320511-15321211	-2.47571	0.000194772	left:LOC644669|NR_027417(4593-)	left	LOC644669
chr16:3720967-3721667	-2.43729	0.000194779	within:CREBBP|NM_001079846(-)//CREBBP|NM_004380(-)	within	CREBBP
chr21:43265271-43268919	-2.54029	0.000195128	promoter region:PKNOX1|NM_004571(+)	promoter region	PKNOX1	PKNOX1
chr1:226534503-226535204	-2.46635	0.000199191	within:OBSCN|NM_052843(+)//OBSCN|NM_001098623(+)	within	OBSCN
chr22:45432466-45433167	-2.44116	0.000199864	within:GRAMD4|NM_015124(+)	within	GRAMD4
chr11:815144-818194	-2.4429	0.000200388	promoter region:EFCAB4A|NM_173584(+)	promoter region	EFCAB4A	EFCAB4A
chr9:138756622-138759672	-2.43927	0.000200588	promoter region:LCN10|NM_001001712(-)	promoter region	LCN10	LCN10
chr16:56388820-56391870	-2.4633	0.000200892	promoter region:KIFC3|NM_001130099(-)	promoter region	KIFC3	KIFC3
chr17:76471993-76472693	-2.47067	0.000201522	within:RPTOR|NM_020761(+)	within	RPTOR
chr19:19244464-19247514	-2.48167	0.000202364	promoter region:TM6SF2|NM_001001524(-)	promoter region	TM6SF2	TM6SF2
chr20:62137496-62141174	-2.47298	0.000203316	promoter region:NCRNA00176|NM_207349(+)	promoter region	NCRNA00176	NCRNA00176
chr11:64633476-64636989	-2.43136	0.000203506	promoter region:TM7SF2|NM_003273(+)	promoter region	TM7SF2	TM7SF2
chr7:101058686-101061736	-2.44099	0.000204246	promoter region:MYL10|NM_138403(-)	promoter region	MYL10	MYL10
chr11:1814368-1818617	-2.43939	0.000204339	promoter region:TNNI2|NM_001145829(+)//TNNI2|NM_003282(+)//TNNI2|NM_001145841(+)	promoter region	TNNI2	TNNI2
chr17:75802689-75803852	-2.46133	0.000204608	within:SGSH|NM_000199(-)	within	SGSH
chr6:150367363-150370413	-2.45421	0.000205512	promoter region:RAET1K|NR_024045(-)	promoter region	RAET1K	RAET1K
chr20:61317288-61320423	-2.46908	0.000205878	promoter region:YTHDF1|NM_017798(-)	promoter region	YTHDF1	YTHDF1
chr12:56297519-56300569	-2.56813	0.000206273	promoter region:SLC26A10|NM_133489(+)	promoter region	SLC26A10	SLC26A10
chr1:151587036-151590086	-2.45179	0.000206412	promoter region:PGLYRP4|NM_020393(-)	promoter region	PGLYRP4	PGLYRP4
chr16:88603420-88606470	-2.44951	0.000206988	promoter region:DBNDD1|NM_024043(-)	promoter region	DBNDD1	DBNDD1
chr8:145620032-145620732	-2.44657	0.000207175	within:VPS28|NM_183057(-)//VPS28|NM_016208(-)	within	VPS28
chr14:105104104-105104804	-2.45593	0.000210578	left:TMEM121|NM_025268(40107+)	left	TMEM121
chr11:64446315-64449365	-2.42772	0.000211081	promoter region:PPP2R5B|NM_006244(+)	promoter region	PPP2R5B	PPP2R5B
chr19:18195693-18200688	-2.42814	0.0002117	promoter region:PDE4C|NM_001098818(-)//PDE4C|NM_001098819(-)	promoter region	PDE4C	PDE4C
chr6:32154582-32155283	-2.47414	0.000212878	within:TNXB|NM_019105(-)	within	TNXB
chrX:151399570-151400271	-2.46436	0.000213345	left:GABRA3|NM_000808(29083-)	left	GABRA3
chr19:53994448-53995149	-2.465	0.000214448	within:BCAT2|NM_001190(-)	within	BCAT2
chr11:1210424-1211125	-2.42885	0.000215273	within:MUC5AC|NM_017511(+)//MUC5B|NM_002458(+)	within	MUC5AC
chr22:18327629-18330679	-2.43564	0.00021543	promoter region:COMT|NM_007310(+)	promoter region	COMT	COMT
chr7:73427956-73428656	-2.44118	0.000216025	within:CLIP2|NM_032421(+)//CLIP2|NM_003388(+)	within	CLIP2
chr16:29939715-29942765	-2.42382	0.000216113	promoter region:C16orf92|NM_001109659(+)//C16orf92|NM_001109660(+)	promoter region	C16orf92	C16orf92
chr22:19646977-19652056	-2.43038	0.000216312	promoter region:AIFM3|NR_027464(+)//AIFM3|NM_001146288(+)//AIFM3|NM_144704(+)//AIFM3|NM_001018060(+)	promoter region	AIFM3	AIFM3
chr16:88304519-88306290	-2.50708	0.000217979	within:C16orf7|NM_004913(-)	within	C16orf7
chr17:77954821-77955522	-2.43438	0.000219452	within:C17orf101|NM_175902(-)//C17orf101|NM_024648(-)	within	C17orf101
chr12:130736641-130737341	-2.44357	0.000219701	left:LOC116437|NR_026670(521133+)	left	LOC116437
chr10:48877221-48880271	-2.44842	0.000220488	promoter region:FAM25B|NM_001137556(-)//FAM25C|NM_001137548(-)//FAM25G|NM_001137549(-)	promoter region	FAM25B	FAM25B
chr5:176004553-176007603	-2.55558	0.000220664	promoter region:TSPAN17|NM_130465(+)//TSPAN17|NM_012171(+)//TSPAN17|NM_001006616(+)	promoter region	TSPAN17	TSPAN17
chr15:63290283-63293333	-2.42912	0.000220987	promoter region:CILP|NM_003613(-)	promoter region	CILP	CILP
chr6:169383486-169384187	-2.45536	0.000221383	within:THBS2|NM_003247(-)	within	THBS2
chr8:145183068-145183769	-2.43031	0.000221692	within:OPLAH|NM_017570(-)	within	OPLAH
chr20:62149868-62153863	-2.42512	0.000223675	promoter region:SOX18|NM_018419(-)	promoter region	SOX18	SOX18
chr19:50593060-50593760	-2.45583	0.000223958	within:PPP1R13L|NM_001142502(-)//PPP1R13L|NM_006663(-)	within	PPP1R13L
chr9:138994825-138997875	-2.42199	0.000224317	promoter region:LCNL1|NM_207510(+)	promoter region	LCNL1	LCNL1
chr1:2435011-2435712	-2.41546	0.000226574	within:PANK4|NM_018216(-)	within	PANK4
chr16:28794869-28797919	-2.42742	0.000227315	promoter region:ATP2A1|NM_004320(+)//ATP2A1|NM_173201(+)	promoter region	ATP2A1	ATP2A1
chr20:35238429-35243828	-2.44094	0.000228919	promoter region:RPN2|NM_002951(+)//C20orf132|NM_152503(-)//RPN2|NM_001135771(+)//C20orf132|NM_213632(-)//C20orf132|NM_213631(-)	promoter region	RPN2	RPN2
chr21:43729188-43729888	-2.49583	0.000231398	left:C21orf84|NR_026863(6657-)	left	C21orf84
chr6:150431285-150434335	-2.43441	0.000231667	promoter region:ULBP3|NM_024518(-)	promoter region	ULBP3	ULBP3
chr17:77777141-77784042	-2.4401	0.000232367	promoter region:SLC16A3|NM_001042423(+)//SLC16A3|NM_001042422(+)//SLC16A3|NM_004207(+)	promoter region	SLC16A3	SLC16A3
chr17:43245709-43246410	-2.42844	0.000232884	within:OSBPL7|NM_145798(-)	within	OSBPL7
chr17:39374749-39377799	-2.43561	0.000234733	promoter region:PPY|NM_002722(-)	promoter region	PPY	PPY
chr8:144887191-144890342	-2.42375	0.000234906	promoter region:FAM83H|NM_198488(-)	promoter region	FAM83H	FAM83H
chr16:56636292-56636992	-2.47133	0.000235361	within:MMP15|NM_002428(+)	within	MMP15
chr16:82827790-82828490	-2.41536	0.000237987	within:KCNG4|NM_172347(-)	within	KCNG4
chr9:131670044-131670745	-2.42821	0.00023853	within:USP20|NM_001008563(+)//USP20|NM_006676(+)//USP20|NM_001110303(+)	within	USP20
chr20:59881964-59882664	-2.44036	0.000239811	within:CDH4|NM_001794(+)	within	CDH4
chr12:66932938-66935988	-2.42558	0.000240826	promoter region:IL22|NM_020525(-)	promoter region	IL22	IL22
chr11:68206118-68209422	-2.41611	0.000241181	promoter region:GAL|NM_015973(+)	promoter region	GAL	GAL
chr15:76073012-76076062	-2.42649	0.000241208	promoter region:LOC91450|NR_026998(-)	promoter region	LOC91450	LOC91450
chr19:7591152-7592182	-2.43684	0.000241361	within:XAB2|NM_020196(-)	within	XAB2
chr22:35584535-35587585	-2.50874	0.000241754	promoter region:NCF4|NM_013416(+)//NCF4|NM_000631(+)	promoter region	NCF4	NCF4
chr9:133292857-133295907	-2.41833	0.000242083	promoter region:BAT2L1|NM_013318(+)	promoter region	BAT2L1	BAT2L1
chr16:615673-616374	-2.41635	0.000242795	within:RAB40C|NM_021168(+)	within	RAB40C
chr19:1263787-1264528	-2.41168	0.000243262	left:EFNA2|NM_001405(26620+)	left	EFNA2
chr21:44566758-44567459	-2.4064	0.000245092	within:PFKL|NM_002626(+)//PFKL|NR_024108(+)	within	PFKL
chr15:38971479-38974529	-2.42779	0.000245096	promoter region:VPS18|NM_020857(+)	promoter region	VPS18	VPS18
chr22:44697204-44697904	-2.40833	0.000245526	within:WNT7B|NM_058238(-)	within	WNT7B
chr20:3658915-3661965	-2.44223	0.000245658	promoter region:HSPA12B|NM_052970(+)	promoter region	HSPA12B	HSPA12B
chr5:179238483-179239183	-2.61189	0.000247752	within:TBC1D9B|NM_015043(-)//TBC1D9B|NM_198868(-)	within	TBC1D9B
chr17:70220093-70223143	-2.45992	0.000247818	promoter region:CD300LF|NM_139018(-)	promoter region	CD300LF	CD300LF
chr20:4743159-4746209	-2.41809	0.000247966	promoter region:RASSF2|NM_170774(-)	promoter region	RASSF2	RASSF2
chr19:45071831-45072531	-2.4175	0.000248838	within:FCGBP|NM_003890(-)	within	FCGBP
chr11:76109871-76112921	-2.42563	0.000249936	promoter region:GUCY2E|NR_024042(-)	promoter region	GUCY2E	GUCY2E
chr22:16704318-16705018	-2.40208	0.000250827	within:MICAL3|NM_001122731(-)//MICAL3|NM_015241(-)	within	MICAL3
chr8:145690476-145693526	-2.42915	0.00025129	promoter region:PPP1R16A|NM_032902(+)	promoter region	PPP1R16A	PPP1R16A
chr19:63527756-63530806	-2.47979	0.000251919	promoter region:ZSCAN22|NM_181846(+)	promoter region	ZSCAN22	ZSCAN22
chr19:60689241-60692291	-2.42047	0.00025236	promoter region:SSC5D|NM_001144950(+)	promoter region	SSC5D	SSC5D
chr19:61323583-61326901	2.90389	0.000253809	promoter region:ZNF787|NM_001002836(-)	promoter region	ZNF787	ZNF787
chr15:64580100-64586678	-2.44833	0.000254305	promoter region:RPL4|NM_000968(-)//SNORD18A|NR_002441(-)//ZWILCH|NR_003105(+)//ZWILCH|NM_017975(+)//SNORD18B|NR_002442(-)//SNORD18C|NR_002443(-)//SNORD16|NR_002440(-)	promoter region	RPL4	RPL4
chr18:9090234-9093284	-0.526389	0.000257237	promoter region:NDUFV2|NM_021074(+)	promoter region	NDUFV2	NDUFV2
chr1:2266017-2266718	-2.39635	0.000258831	within:MORN1|NM_024848(-)	within	MORN1
chr20:43902484-43903185	-2.41571	0.000258869	within:SNX21|NM_001042633(+)//SNX21|NM_152897(+)//SNX21|NM_033421(+)//SNX21|NM_001042632(+)	within	SNX21
chr19:55601813-55602513	-2.43321	0.000259845	within:POLD1|NM_002691(+)	within	POLD1
chr2:32139743-32142970	2.85667	0.000260247	promoter region:SPAST|NM_199436(+)//SPAST|NM_014946(+)	promoter region	SPAST	SPAST
chr1:150455240-150455941	-2.39714	0.00026346	within:HRNR|NM_001009931(-)	within	HRNR
chr19:3775968-3776668	-2.4481	0.000263785	within:ZFR2|NM_015174(-)	within	ZFR2
chr19:11031343-11032044	-2.42013	0.000264496	within:SMARCA4|NM_001128846(+)//SMARCA4|NM_001128848(+)//SMARCA4|NM_001128845(+)//SMARCA4|NM_001128847(+)//SMARCA4|NM_001128849(+)//SMARCA4|NM_001128844(+)//SMARCA4|NM_003072(+)	within	SMARCA4
chr7:62678333-62679033	-2.43976	0.000264994	left:LOC643955|NR_003952(276464-)	left	LOC643955
chr17:77451005-77454255	-2.39647	0.000265002	promoter region:NPB|NM_148896(+)	promoter region	NPB	NPB
chr1:154603186-154606236	-2.40479	0.000265345	promoter region:RHBG|NM_020407(+)//RHBG|NR_026549(+)	promoter region	RHBG	RHBG
chr20:61661598-61662298	-2.42752	0.000266088	within:PRIC285|NM_001037335(-)//PRIC285|NM_033405(-)	within	PRIC285
chrX:243871-244571	-2.43345	0.00026876	within:PPP2R3B|NM_013239(-)	within	PPP2R3B
chr17:1574495-1576647	-2.417	0.000269405	left:C17orf91|NM_001001870(8240-)	left	C17orf91
chr6:34208811-34211861	-2.40375	0.000270667	promoter region:GRM4|NM_000841(-)	promoter region	GRM4	GRM4
chr19:6180854-6181912	-2.50506	0.000272307	within:MLLT1|NM_005934(-)	within	MLLT1
chr19:47790312-47793362	-2.4442	0.000272438	promoter region:CEACAM8|NM_001816(-)	promoter region	CEACAM8	CEACAM8
chr1:245341208-245344782	-2.42917	0.000273653	promoter region:C1orf229|NM_207401(-)	promoter region	C1orf229	C1orf229
chr22:37705910-37708960	-2.39938	0.000273905	promoter region:APOBEC3B|NM_004900(+)	promoter region	APOBEC3B	APOBEC3B
chr11:46353310-46354011	-2.39457	0.000275276	within:DGKZ|NM_201532(+)//DGKZ|NM_201533(+)//DGKZ|NM_003646(+)//DGKZ|NM_001105540(+)	within	DGKZ
chr5:131434943-131437993	-2.3985	0.000276231	promoter region:CSF2|NM_000758(+)	promoter region	CSF2	CSF2
chr13:31424777-31425478	-2.47488	0.000276892	within:EEF1DP3|NR_027062(+)	within	EEF1DP3
chr9:134945306-134948356	-2.41661	0.000277911	promoter region:CELP|NR_001275(+)	promoter region	CELP	CELP
chr9:35661474-35664524	-2.48021	0.000278278	promoter region:CA9|NM_001216(+)	promoter region	CA9	CA9
chr2:238723923-238724624	-2.41562	0.000278924	within:KLHL30|NM_198582(+)	within	KLHL30
chr19:61824970-61825996	-2.38208	0.000286176	within:ZNF71|NM_021216(+)	within	ZNF71
chr21:44254193-44257406	2.82611	0.000287472	promoter region:TRAPPC10|NM_003274(+)	promoter region	TRAPPC10	TRAPPC10
chr2:27454662-27455363	-2.39562	0.000288311	within:ZNF513|NM_144631(-)	within	ZNF513
chr18:72191246-72191947	2.87556	0.000288803	left:C18orf62|NM_001037331(922669-)	left	C18orf62
chr21:45234577-45235278	-2.38037	0.000291676	left:C21orf70|NM_058190(50195+)	left	C21orf70
chr19:63683397-63684098	-2.41229	0.000292176	within:ZNF446|NM_017908(+)	within	ZNF446
chr6:168427267-168427967	-2.42202	0.000292436	left:FRMD1|NM_024919(204579-)	left	FRMD1
chr7:5535588-5539198	-2.38199	0.000297331	promoter region:ACTB|NM_001101(-)	promoter region	ACTB	ACTB
chr17:1340947-1345191	-2.38568	0.000298213	promoter region:MYO1C|NM_033375(-)//MYO1C|NM_001080779(-)	promoter region	MYO1C	MYO1C
chr3:37876232-37879282	-2.45371	0.000299325	promoter region:CTDSPL|NM_005808(+)//CTDSPL|NM_001008392(+)	promoter region	CTDSPL	CTDSPL
chr3:88111975-88115025	-2.39058	0.000300358	promoter region:HTR1F|NM_000866(+)	promoter region	HTR1F	HTR1F
chr19:39914879-39917929	-2.39496	0.000300482	promoter region:ZNF181|NM_001145665(+)//ZNF181|NM_001029997(+)	promoter region	ZNF181	ZNF181
chr17:72980479-72983529	-2.37462	0.000300869	promoter region:SEPT9|NM_001113495(+)	promoter region	SEPT9	SEPT9
chr1:35142961-35146011	-2.37772	0.000306053	promoter region:DLGAP3|NM_001080418(-)	promoter region	DLGAP3	DLGAP3
chr11:117203407-117206457	-2.38044	0.000306064	promoter region:FXYD2|NM_021603(-)	promoter region	FXYD2	FXYD2
chr9:139083976-139087289	-2.41308	0.000306202	promoter region:C9orf140|NM_178448(-)	promoter region	C9orf140	C9orf140
chr11:56950489-56954069	-2.41442	0.000307851	promoter region:SLC43A3|NM_017611(-)//SLC43A3|NM_014096(-)//SLC43A3|NM_199329(-)	promoter region	SLC43A3	SLC43A3
chr5:242185-245544	-2.37787	0.000309679	promoter region:LRRC14B|NM_001080478(+)	promoter region	LRRC14B	LRRC14B
chr13:112472652-112473353	-2.65054	0.000310878	within:ATP11A|NM_032189(+)//ATP11A|NM_015205(+)	within	ATP11A
chr8:144364002-144367052	-2.39363	0.000311188	promoter region:GPIHBP1|NM_178172(+)	promoter region	GPIHBP1	GPIHBP1
chr4:939152-939853	-2.38921	0.000311673	within:TMEM175|NM_032326(+)	within	TMEM175
chr17:3421139-3421840	-2.37229	0.000316166	within:TRPV1|NM_080706(-)//TRPV1|NM_080705(-)//TRPV1|NM_018727(-)//TRPV1|NM_080704(-)	within	TRPV1
chr3:128872030-128875121	-2.39542	0.000317345	promoter region:ABTB1|NM_172027(+)//ABTB1|NM_172028(+)//ABTB1|NM_032548(+)	promoter region	ABTB1	ABTB1
chr13:112154091-112154792	-2.40654	0.000317798	left:C13orf28|NM_145248(75422+)	left	C13orf28
chr5:1252269-1255319	-2.38132	0.000319565	promoter region:SLC6A19|NM_001003841(+)	promoter region	SLC6A19	SLC6A19
chr16:88189072-88189772	-2.40907	0.000320727	within:CPNE7|NM_014427(+)//CPNE7|NM_153636(+)	within	CPNE7
chr12:55013186-55019539	-2.3951	0.000320892	promoter region:PAN2|NM_001127460(-)//IL23A|NM_016584(+)//PAN2|NM_014871(-)	promoter region	PAN2	PAN2
chr17:68769004-68772054	-2.37	0.000321486	promoter region:CPSF4L|NM_001129885(-)	promoter region	CPSF4L	CPSF4L
chr9:139563689-139567247	-2.39091	0.000327996	promoter region:PNPLA7|NM_001098537(-)//MRPL41|NM_032477(+)//PNPLA7|NM_152286(-)	promoter region	PNPLA7	PNPLA7
chr21:44669420-44670121	-2.36466	0.000328745	within:TRPM2|NM_003307(+)	within	TRPM2
chr7:157102454-157103155	-2.38943	0.000328894	within:PTPRN2|NM_130842(-)//PTPRN2|NM_130843(-)//PTPRN2|NM_002847(-)	within	PTPRN2
chr11:64879765-64880465	-2.36521	0.000330484	within:TIGD3|NM_145719(+)	within	TIGD3
chr22:23326739-23329789	-2.35739	0.000331476	promoter region:GGT1|NM_001032364(+)//GGT1|NM_005265(+)	promoter region	GGT1	GGT1
chr22:18023788-18024488	-2.37543	0.00033351	left:LOC150185|NR_024381(89426-)	left	LOC150185
chr6:122970635-122973685	2.78	0.000334984	promoter region:PKIB|NM_032471(+)//PKIB|NM_181795(+)	promoter region	PKIB	PKIB
chr16:32946422-32948108	-2.39432	0.000340578	left:SLC6A10P|NR_003083(142458-)	left	SLC6A10P
chr16:56494901-56495602	-2.40844	0.000341406	within:CNGB1|NM_001297(-)	within	CNGB1
chr14:103070415-103071116	-2.35746	0.000343354	within:TRMT61A|NM_152307(+)	within	TRMT61A
chr19:4252818-4256200	-2.36417	0.000346326	promoter region:TMIGD2|NM_144615(-)//FSD1|NM_024333(+)	promoter region	TMIGD2	TMIGD2
chr11:1084946-1085920	2.79844	0.00034664	within:MUC2|NM_002457(+)	within	MUC2
chr18:75413462-75414163	-2.4294	0.00034745	left:NFATC1|NM_172389//NFATC1|NM_172387(152149+)	left	NFATC1
chr1:2329571-2330271	-2.39738	0.000355592	within:PEX10|NM_002617(-)//PEX10|NM_153818(-)	within	PEX10
chr1:159281771-159284821	-2.38932	0.000358686	promoter region:USF1|NM_207005(-)//USF1|NM_007122(-)	promoter region	USF1	USF1
chr1:150070362-150073412	-2.39307	0.000359954	promoter region:RORC|NM_005060(-)	promoter region	RORC	RORC
chr19:2758224-2759386	-2.35667	0.000371126	within:THOP1|NM_003249(+)	within	THOP1
chr17:76746226-76746927	-2.35161	0.000373967	within:AATK|NM_001080395(-)	within	AATK
chr3:49881741-49884813	-2.34062	0.000377773	promoter region:CAMKV|NM_024046(-)	promoter region	CAMKV	CAMKV
chr17:18219363-18222413	-2.37868	0.000381798	promoter region:EVPLL|NM_001145127(+)	promoter region	EVPLL	EVPLL
chr10:72100124-72103174	-2.34262	0.000384349	promoter region:ADAMTS14|NM_080722(+)//ADAMTS14|NM_139155(+)	promoter region	ADAMTS14	ADAMTS14
chr11:108795644-108798694	-2.35117	0.000385215	promoter region:C11orf87|NM_207645(+)	promoter region	C11orf87	C11orf87
chr1:151629563-151632613	-2.39706	0.000385483	promoter region:S100A8|NM_002964(-)	promoter region	S100A8	S100A8
chr3:9007038-9007738	-2.33726	0.00039279	within:SRGAP3|NM_001033117(-)//SRGAP3|NM_014850(-)	within	SRGAP3
chr16:3640500-3643550	-2.3333	0.000398691	promoter region:DNASE1|NM_005223(+)	promoter region	DNASE1	DNASE1
chr19:1875293-1875994	-2.43483	0.000399145	within:SCAMP4|NM_079834(+)	within	SCAMP4
chr13:56627444-56628145	2.73203	0.000401575	within:PRR20C|NM_001130405(+)//PRR20B|NM_001130404(+)//PRR20A|NM_198441(+)//PRR20D|NM_001130406(+)//PRR20E|NM_001130407(+)	within	PRR20C
chr10:102744514-102749788	-2.4195	0.000407211	promoter region:LZTS2|NM_032429(+)	promoter region	LZTS2	LZTS2
chr18:75409062-75409803	-2.35708	0.000410836	left:NFATC1|NM_172389//NFATC1|NM_172387(147749+)	left	NFATC1
chrX:48844393-48847443	-2.36801	0.000414665	promoter region:WDR45|NM_007075(-)	promoter region	WDR45	WDR45
chr1:43573621-43576671	-2.40568	0.00041489	promoter region:MPL|NM_005373(+)	promoter region	MPL	MPL
chr16:1296740-1301855	-2.33404	0.000421273	promoter region:UBE2I|NM_194260(+)//|NR_027453(-)//UBE2I|NM_194259(+)//UBE2I|NM_194261(+)//UBE2I|NM_003345(+)	promoter region	UBE2I	UBE2I
chr13:22168399-22169100	2.71778	0.000425772	left:FGF9|NM_002010(1025185+)	left	FGF9
chr15:89163205-89163906	-2.32308	0.000426605	left:BLM|NM_000057(101623+)	left	BLM
chr20:31104450-31107500	-2.31932	0.000436175	promoter region:C20orf185|NM_182658(+)	promoter region	C20orf185	C20orf185
chr14:22573584-22576709	2.741	0.000437094	promoter region:PSMB5|NM_002797(-)//PSMB5|NM_001144932(-)//PSMB5|NM_001130725(-)	promoter region	PSMB5	PSMB5
chr16:33047580-33048280	-2.38	0.000444642	left:SLC6A10P|NR_003083(243616-)	left	SLC6A10P
chr2:241172377-241175508	-2.31505	0.000446555	promoter region:CAPN10|NM_023083(+)//CAPN10|NM_021251(+)//CAPN10|NM_023085(+)//CAPN10|NM_023089(+)	promoter region	CAPN10	CAPN10
chrX:150893197-150896247	-2.32367	0.000451529	promoter region:GABRE|NM_004961(-)	promoter region	GABRE	GABRE
chr1:111790825-111795793	2.69876	0.000457438	promoter region:ATP5F1|NM_001688(+)//WDR77|NM_024102(-)	promoter region	ATP5F1	ATP5F1
chr13:56634015-56634716	2.69893	0.000463072	within:PRR20C|NM_001130405(+)//PRR20B|NM_001130404(+)//PRR20A|NM_198441(+)//PRR20D|NM_001130406(+)//PRR20E|NM_001130407(+)	within	PRR20C
chr19:18433163-18433864	-2.37263	0.00046616	within:ELL|NM_006532(-)	within	ELL
chr1:52869213-52872263	-2.33125	0.000470733	promoter region:FAM159A|NM_001042693(+)	promoter region	FAM159A	FAM159A
chr19:54659111-54659812	-2.32725	0.000471322	within:ALDH16A1|NM_153329(+)//ALDH16A1|NM_001145396(+)	within	ALDH16A1
chrX:129864279-129867329	-2.31158	0.000481795	promoter region:ENOX2|NM_182314(-)//ENOX2|NM_006375(-)	promoter region	ENOX2	ENOX2
chr11:76861841-76865196	2.73622	0.000481973	promoter region:PAK1|NM_002576(-)//PAK1|NM_001128620(-)	promoter region	PAK1	PAK1
chr19:60795540-60796783	-2.40875	0.000490934	within:FIZ1|NM_032836(-)	within	FIZ1
chr11:30206698-30209748	2.68389	0.000500188	promoter region:FSHB|NM_001018080(+)//FSHB|NM_000510(+)	promoter region	FSHB	FSHB
chrX:77243881-77246931	-2.31048	0.00050058	promoter region:PGK1|NM_000291(+)	promoter region	PGK1	PGK1
chr13:56640580-56641281	2.66325	0.000510759	within:PRR20A|NM_198441(+)//PRR20B|NM_001130404(+)//PRR20C|NM_001130405(+)//PRR20D|NM_001130406(+)//PRR20E|NM_001130407(+)	within	PRR20A
chr13:56620871-56621572	2.66095	0.000512002	within:PRR20C|NM_001130405(+)//PRR20A|NM_198441(+)//PRR20B|NM_001130404(+)//PRR20D|NM_001130406(+)//PRR20E|NM_001130407(+)	within	PRR20C
chr9:135834068-135834769	-2.30135	0.00051629	within:VAV2|NM_001134398(-)//VAV2|NM_003371(-)	within	VAV2
chr16:629409-632701	-2.32	0.000519336	promoter region:FAM195A|NM_138418(+)	promoter region	FAM195A	FAM195A
chr3:110021880-110024930	2.65702	0.00053463	promoter region:TRAT1|NM_016388(+)	promoter region	TRAT1	TRAT1
chr4:155919436-155922778	2.64917	0.000539582	promoter region:RBM46|NM_144979(+)	promoter region	RBM46	RBM46
chr22:23331214-23334264	-2.28144	0.000557366	promoter region:GGT1|NM_001032365(+)	promoter region	GGT1	GGT1
chr4:189817175-189817875	2.64008	0.00055786	left:TRIML1|NM_178556(519584+)	left	TRIML1
chr8:145262219-145265525	-2.29476	0.000575235	promoter region:C8orf30A|NM_016458(+)	promoter region	C8orf30A	C8orf30A
chr18:75371614-75372315	2.62292	0.000579954	within:NFATC1|NM_172388(+)//NFATC1|NM_006162(+)//NFATC1|NM_172387(+)//NFATC1|NM_172389(+)	within	NFATC1
chr19:18749032-18749969	-2.29271	0.000580299	within:CRTC1|NM_001098482(+)//CRTC1|NM_015321(+)	within	CRTC1
chr11:1086045-1086746	2.63667	0.000617052	within:MUC2|NM_002457(+)	within	MUC2
chr13:56614301-56615002	2.61333	0.000617948	within:PRR20A|NM_198441(+)//PRR20B|NM_001130404(+)//PRR20C|NM_001130405(+)//PRR20D|NM_001130406(+)//PRR20E|NM_001130407(+)	within	PRR20A
chr6:29469954-29473004	2.63542	0.000628935	promoter region:OR12D2|NM_013936(+)	promoter region	OR12D2	OR12D2
chr11:73855638-73858688	-2.24994	0.000655457	promoter region:KCNE3|NM_005472(-)	promoter region	KCNE3	KCNE3
chr13:43257858-43261546	2.60556	0.000671247	promoter region:ENOX1|NM_017993(-)	promoter region	ENOX1	ENOX1
chr4:7825182-7825882	2.59249	0.000673944	within:AFAP1|NM_001134647(-)//AFAP1|NM_198595(-)//AFAP1AS|NR_026892(+)	within	AFAP1
chr1:181825752-181829109	2.58119	0.000685318	promoter region:NCF2|NM_001127651(-)//NCF2|NM_000433(-)	promoter region	NCF2	NCF2
chr5:10492568-10495618	2.56738	0.000686434	promoter region:ROPN1L|NM_031916(+)	promoter region	ROPN1L	ROPN1L
chr5:180593624-180594325	-2.30955	0.000688301	within:TRIM41|NM_201627(+)//TRIM41|NM_033549(+)	within	TRIM41
chrX:37249136-37249837	2.58315	0.000689389	left:PRRG1|NM_001142395//PRRG1|NM_000950(155688+)	left	PRRG1
chr16:2517735-2518436	-2.27875	0.000696613	within:AMDHD2|NM_015944(+)//AMDHD2|NM_001145815(+)	within	AMDHD2
chr1:31180600-31183650	2.73	0.000707955	promoter region:SNORD103A|NR_004054(-)	promoter region	SNORD103A	SNORD103A
chr13:102223299-102226590	2.56778	0.000710465	promoter region:C13orf27|NM_138779(-)	promoter region	C13orf27	C13orf27
chr7:139122209-139126505	2.56265	0.000728092	promoter region:TBXAS1|NM_001130966(+)//HIPK2|NM_022740(-)//HIPK2|NM_001113239(-)	promoter region	TBXAS1	TBXAS1
chr17:55823758-55826808	-0.629119	0.000741962	promoter region:USP32|NM_032582(-)	promoter region	USP32	USP32
chr8:47869232-47872282	2.5575	0.000742775	promoter region:BEYLA|NR_027012(+)//BEYLA|NR_027013(+)	promoter region	BEYLA	BEYLA
chr3:99723897-99727040	2.58611	0.000747078	promoter region:CLDND1|NM_001040199(-)//CLDND1|NM_001040181(-)//CLDND1|NM_019895(-)//CLDND1|NM_001040200(-)//CLDND1|NM_001040182(-)//CLDND1|NM_001040183(-)	promoter region	CLDND1	CLDND1
chr7:50169074-50169775	2.56278	0.000768409	left:ZPBP|NM_007009(65702-)	left	ZPBP
chrX:21583939-21588809	-0.655188	0.000771447	promoter region:KLHL34|NM_153270(-)	promoter region	KLHL34	KLHL34
chr4:190968565-190969266	2.53966	0.000777091	left:TRIML1|NM_178556(1670974+)	left	TRIML1
chr7:5075823-5078873	-2.24958	0.000778214	promoter region:LOC389458|NR_015343(+)	promoter region	LOC389458	LOC389458
chr7:158042148-158042852	2.54181	0.000780557	within:PTPRN2|NM_130842(-)//PTPRN2|NM_130843(-)//PTPRN2|NM_002847(-)	within	PTPRN2
chr7:75867350-75868051	-2.25525	0.000784327	within:SRCRB4D|NM_080744(-)//ZP3|NM_007155(+)	within	SRCRB4D
chr17:872736-873437	2.53167	0.000785101	within:ABR|NM_001092(-)//ABR|NM_021962(-)//ABR|NM_001159746(-)	within	ABR
chr3:158320508-158321208	2.516	0.000804902	left:LEKR1|NM_001004316(293719+)	left	LEKR1
chr1:42402372-42405422	-0.518539	0.000828324	promoter region:GUCA2A|NM_033553(-)	promoter region	GUCA2A	GUCA2A
chr4:78253132-78253832	2.50722	0.000843364	left:CCNI|NM_006835(36983-)	left	CCNI
chr16:45212202-45215252	2.5346	0.000850605	promoter region:SHCBP1|NM_024745(-)	promoter region	SHCBP1	SHCBP1
chr17:16510602-16511303	2.497	0.000863714	left:ZNF624|NM_020787(12719-)	left	ZNF624
chr2:239776921-239777622	2.52033	0.00086612	within:HDAC4|NM_006037(-)	within	HDAC4
chr15:99608674-99612089	2.59081	0.000869854	promoter region:CHSY1|NM_014918(-)	promoter region	CHSY1	CHSY1
chr8:16926678-16929728	2.55889	0.000881648	promoter region:EFHA2|NM_181723(+)	promoter region	EFHA2	EFHA2
chr7:99364569-99367619	-2.20708	0.000904589	promoter region:GJC3|NM_181538(-)	promoter region	GJC3	GJC3
chr22:47405199-47405899	2.46302	0.00091587	within:FAM19A5|NM_015381(+)//FAM19A5|NM_001082967(+)	within	FAM19A5
chr16:70305595-70308645	2.45656	0.000917072	promoter region:PHLPP2|NM_015020(-)	promoter region	PHLPP2	PHLPP2
chr5:6807895-6808596	2.46967	0.000940718	within:PAPD7|NM_006999(+)	within	PAPD7
chr15:50096262-50099472	2.43711	0.000956762	promoter region:MAPK6|NM_002748(+)	promoter region	MAPK6	MAPK6
chr1:143786671-143789876	2.47111	0.000991516	promoter region:PDE4DIP|NM_022359(-)	promoter region	PDE4DIP	PDE4DIP
chr5:14513946-14514647	2.48175	0.000993137	within:TRIO|NM_007118(+)	within	TRIO
chr15:86963090-86966140	2.43744	0.00100299	promoter region:AEN|NM_022767(+)	promoter region	AEN	AEN
chr19:42874446-42877496	2.4148	0.00100375	promoter region:ZNF781|NM_152605(-)	promoter region	ZNF781	ZNF781
chr11:69391867-69392567	2.40981	0.001021	left:FGF3|NM_005247(48738-)	left	FGF3
chr6:39190233-39193283	2.418	0.00104725	promoter region:C6orf64|NM_018322(-)	promoter region	C6orf64	C6orf64
chr17:18521237-18521937	2.43782	0.00105722	within:ZNF286B|NM_001145045(-)	within	ZNF286B
chr6:127837942-127840992	2.427	0.00105723	promoter region:KIAA0408|NM_014702(-)	promoter region	KIAA0408	KIAA0408
chr8:93225314-93226015	2.38622	0.00108321	left:RUNX1T1|NM_175635(48695-)	left	RUNX1T1
chr5:110100212-110103262	2.37078	0.00109576	promoter region:SLC25A46|NM_138773(+)	promoter region	SLC25A46	SLC25A46
chrX:153647556-153650606	2.37353	0.00110029	promoter region:SNORA36A|NR_002969(+)	promoter region	SNORA36A	SNORA36A
chr19:1858963-1859664	2.39417	0.00110186	within:SCAMP4|NM_079834(+)//ADAT3|NM_138422(+)	within	SCAMP4
chr3:46591743-46594793	2.40356	0.00111039	promoter region:TDGF1|NM_003212(+)	promoter region	TDGF1	TDGF1
chr21:10011784-10015231	2.39264	0.00114326	promoter region:TPTE|NM_199261(-)//TPTE|NM_199260(-)//TPTE|NM_199259(-)	promoter region	TPTE	TPTE
chr12:51046883-51050016	2.34606	0.00115243	promoter region:KRT85|NM_002283(-)	promoter region	KRT85	KRT85
chr10:118071489-118074539	2.34417	0.00115409	promoter region:C10orf96|NM_198515(+)	promoter region	C10orf96	C10orf96
chr12:31688920-31691970	2.36517	0.00115621	promoter region:C12orf72|NM_001135864(+)	promoter region	C12orf72	C12orf72
chr20:60149776-60154309	2.37867	0.00116298	promoter region:SS18L1|NM_198935(+)//PSMA7|NM_002792(-)	promoter region	SS18L1	SS18L1
chr1:245776633-245779683	2.35972	0.00116857	promoter region:C1orf150|NM_145278(+)	promoter region	C1orf150	C1orf150
chr7:128569507-128572557	2.33324	0.00117591	promoter region:TSPAN33|NM_178562(+)	promoter region	TSPAN33	TSPAN33
chr14:34581423-34585970	2.33167	0.00118453	promoter region:FAM177A1|NM_001079519(+)//FAM177A1|NM_173607(+)	promoter region	FAM177A1	FAM177A1
chr4:1979512-1983197	2.36639	0.00119234	promoter region:WHSC2|NM_005663(-)	promoter region	WHSC2	WHSC2
chr6:170333281-170334374	2.34	0.00119616	left:NCRNA00242|NR_026781(392435-)	left	NCRNA00242
chr17:61252513-61255563	2.32833	0.00119689	promoter region:CCDC46|NM_001037325(-)	promoter region	CCDC46	CCDC46
chr16:31406151-31408065	2.32861	0.00120725	within:SLC5A2|NM_003041(+)	within	SLC5A2
chr12:48474725-48475425	2.32471	0.00122562	within:NCKAP5L|NM_001037806(-)	within	NCKAP5L
chr2:97714860-97717910	2.35367	0.00122605	promoter region:ZAP70|NM_207519(+)	promoter region	ZAP70	ZAP70
chr19:4051922-4053222	-2.1048	0.00124525	within:MAP2K2|NM_030662(-)	within	MAP2K2
chr5:134942077-134945308	2.29467	0.00124753	promoter region:CXCL14|NM_004887(-)	promoter region	CXCL14	CXCL14
chr5:140778280-140781450	2.29232	0.0012521	promoter region:PCDHGA11|NM_018914(+)//PCDHGA11|NM_032092(+)//PCDHGA11|NM_032091(+)	promoter region	PCDHGA11	PCDHGA11
chr15:59307715-59311234	2.29089	0.00125995	promoter region:RORA|NM_134261(-)	promoter region	RORA	RORA
chr3:42789139-42792189	2.35167	0.00126036	promoter region:CCDC13|NM_144719(-)	promoter region	CCDC13	CCDC13
chr6:169891205-169896003	2.31322	0.00126122	promoter region:C6orf70|NM_018341(+)//TCTE3|NM_174910(-)	promoter region	C6orf70	C6orf70
chr8:9988035-9991085	2.28583	0.0012647	promoter region:MSRA|NM_001135671(+)	promoter region	MSRA	MSRA
chr11:7064300-7067952	2.285	0.0012742	promoter region:RBMXL2|NM_014469(+)	promoter region	RBMXL2	RBMXL2
chr2:237986979-237990029	2.30841	0.0012892	promoter region:COL6A3|NM_057165(-)//COL6A3|NM_057166(-)//COL6A3|NM_004369(-)//COL6A3|NM_057167(-)//COL6A3|NM_057164(-)	promoter region	COL6A3	COL6A3
chr9:27286527-27289577	2.27881	0.00129289	promoter region:C9orf11|NM_020641(-)	promoter region	C9orf11	C9orf11
chr1:90056720-90060677	2.37433	0.00131434	promoter region:LRRC8D|NM_018103(+)//LRRC8D|NM_001134479(+)	promoter region	LRRC8D	LRRC8D
chr12:30739408-30742458	2.31372	0.00131597	promoter region:IPO8|NM_006390(-)	promoter region	IPO8	IPO8
chr17:72150879-72153929	2.25067	0.00133351	promoter region:ST6GALNAC1|NM_018414(-)	promoter region	ST6GALNAC1	ST6GALNAC1
chr4:139701978-139702705	-0.533889	0.0013348	left:SLC7A11|NM_014331(319025-)	left	SLC7A11
chr3:11721350-11722051	2.49056	0.00134259	within:VGLL4|NM_014667(-)	within	VGLL4
chr7:116854203-116857253	2.25308	0.00134667	promoter region:ASZ1|NM_130768(-)//ASZ1|NR_023315(-)	promoter region	ASZ1	ASZ1
chr14:100978304-100979005	2.25211	0.00139002	left:SNORD114-31|NR_003224(448979+)	left	SNORD114-31
chr8:87589515-87592565	2.21	0.00140241	promoter region:FAM82B|NM_016033(-)	promoter region	FAM82B	FAM82B
chr2:666651-669879	2.21842	0.00140341	promoter region:TMEM18|NM_152834(-)	promoter region	TMEM18	TMEM18
chr6:129292559-129293259	2.35635	0.00140487	within:LAMA2|NM_000426(+)//LAMA2|NM_001079823(+)	within	LAMA2
chr4:183957652-183958733	2.27133	0.00141374	within:ODZ3|NM_001080477(+)	within	ODZ3
chr19:43668013-43668714	2.30417	0.00141485	within:RYR1|NM_000540(+)//RYR1|NM_001042723(+)	within	RYR1
chr14:100470140-100482348	2.20972	0.00142029	promoter region:SNORD113-5|NR_003233(+)//SNORD113-8|NR_003236(+)//SNORD113-7|NR_003235(+)//SNORD113-9|NR_003237(+)//SNORD113-6|NR_003234(+)//SNORD113-4|NR_003232(+)	promoter region	SNORD113-5	SNORD113-5
chr5:178916897-178919947	2.17944	0.00143612	promoter region:RUFY1|NM_001040452(+)//RUFY1|NM_001040451(+)	promoter region	RUFY1	RUFY1
chr13:59484734-59487784	2.1712	0.00145787	promoter region:DIAPH3|NM_030932(-)	promoter region	DIAPH3	DIAPH3
chr5:67617567-67622860	2.18833	0.00146314	promoter region:PIK3R1|NM_181504(+)//PIK3R1|NM_181524(+)	promoter region	PIK3R1	PIK3R1
chr1:177825207-177828257	2.18111	0.00147615	promoter region:TDRD5|NM_173533(+)	promoter region	TDRD5	TDRD5
chr13:44459246-44464053	2.22433	0.00148845	promoter region:NUFIP1|NM_012345(-)//KIAA1704|NM_018559(+)	promoter region	NUFIP1	NUFIP1
chr10:62205785-62210514	2.12167	0.00150385	promoter region:CDK1|NM_001130829(+)//CDK1|NM_001786(+)//CDK1|NM_033379(+)	promoter region	CDK1	CDK1
chr7:35804711-35808116	2.21278	0.0015409	promoter region:SEPT7|NM_001788(+)//SEPT7|NM_001011553(+)	promoter region	SEPT7	SEPT7
chr19:5047358-5048058	2.21833	0.00154575	within:KDM4B|NM_015015(+)	within	KDM4B
chr6:137282654-137287135	-2.3324	0.00191343	promoter region:SLC35D3|NM_001008783(+)	promoter region	SLC35D3	SLC35D3
chr1:199753214-199756264	-0.554852	0.00264599	promoter region:RPS10P7|NR_026667(+)	promoter region	RPS10P7	RPS10P7
chr19:4178099-4181149	-0.500227	0.0032985	promoter region:EBI3|NM_005755(+)	promoter region	EBI3	EBI3
chr11:89180781-89183831	-0.506778	0.00346088	promoter region:TRIM49|NM_020358(-)	promoter region	TRIM49	TRIM49
chr6:165642491-165645541	-0.514077	0.00372289	promoter region:C6orf118|NM_144980(-)	promoter region	C6orf118	C6orf118
chr3:46693293-46696343	-1.97212	0.00427923	promoter region:ALS2CL|NM_182775(-)	promoter region	ALS2CL	ALS2CL
chr1:165072907-165075968	1.84333	0.00474727	promoter region:POGK|NM_017542(+)	promoter region	POGK	POGK
chr4:46605399-46608449	-0.501667	0.00591087	promoter region:COX7B2|NM_130902(-)	promoter region	COX7B2	COX7B2
chr7:102043815-102046865	-0.512222	0.00634844	promoter region:RASA4|NM_006989(-)//RASA4|NM_001079877(-)	promoter region	RASA4	RASA4
chr11:62097426-62100476	-1.96638	0.00667988	promoter region:EEF1G|NM_001404(-)	promoter region	EEF1G	EEF1G
chr3:57173283-57176883	-1.85396	0.00733163	promoter region:IL17RD|NM_017563(-)	promoter region	IL17RD	IL17RD
chr13:113526723-113529773	-2.22883	0.00806782	promoter region:FLJ44054|NR_024609(-)	promoter region	FLJ44054	FLJ44054
chr21:44802461-44805511	-2.05132	0.00818989	promoter region:KRTAP10-3|NM_198696(-)	promoter region	KRTAP10-3	KRTAP10-3
chr11:129442485-129446008	-2.07208	0.00819116	promoter region:APLP2|NM_001142276(+)//APLP2|NM_001642(+)//APLP2|NM_001142278(+)//APLP2|NR_024515(+)//APLP2|NM_001142277(+)//APLP2|NR_024516(+)	promoter region	APLP2	APLP2
chr2:112661037-112661738	-0.537738	0.00840156	within:FBLN7|NM_153214(+)//FBLN7|NM_001128165(+)	within	FBLN7
chr2:10583754-10584454	-2.00208	0.00952079	left:ODC1|NM_002539(77850-)	left	ODC1
chr6:158427560-158428261	-0.667326	0.00963911	within:SYNJ2|NM_003898(+)	within	SYNJ2
chr9:96395286-96398336	-2.16169	0.00969422	promoter region:FBP2|NM_003837(-)	promoter region	FBP2	FBP2
chr1:158135920-158138970	-2.06983	0.00989242	promoter region:CCDC19|NM_012337(-)	promoter region	CCDC19	CCDC19
